# Supplementary material
Source: HighWire-hosted journal article supplement (https://erj.ersjournals.com/content/52/3/1800647)
Supplement: inline-supplementary-material-1 [file inline-supplementary-material-1.pdf]

## **Heritability and genome wide association study of diffusing capacity of the lung (DLCo)**

Natalie Terzikhan<sup>\*1,2</sup>, Fangui Sun<sup>\*3</sup>, Fien M. Verhamme<sup>\*1</sup>, Hieab H.H. Adams<sup>2,4</sup>, Daan Loth<sup>2</sup>, Bruno H. C. Stricker<sup>2</sup>, Ken R. Bracke<sup>1</sup>, Lies Lahousse<sup>\*2,5</sup>, Josée Dupuis<sup>\*3</sup>, Guy G. Brusselle<sup>\*1,2,6</sup>, George T. O'Connor<sup>\*7</sup>

Correspondence:

Bruno H. Stricker, MMed. PhD

Department of Epidemiology

Erasmus MC – University Medical Center Rotterdam, PO Box 2040, 3000 CA Rotterdam, the Netherlands

Email: b.stricker@erasmusmc.nl

Phone: +31 10 70 44292

Fax: +31 10 70 44657

Online Data Supplement

## Contents

|                                                                                                                                                  |           |
|--------------------------------------------------------------------------------------------------------------------------------------------------|-----------|
| <b>Supplemental methods</b>                                                                                                                      | <b>4</b>  |
| Rotterdam study                                                                                                                                  | 4         |
| Framingham Heart Study                                                                                                                           | 4         |
| Lung function                                                                                                                                    | 5         |
| Genetics                                                                                                                                         | 5         |
| Heritability                                                                                                                                     | 6         |
| Genetic correlations                                                                                                                             | 6         |
| Overlap with reported COPD and emphysema GWAS associations                                                                                       | 7         |
| FINEMAP                                                                                                                                          | 7         |
| ADGRG6 mRNA expression in lung tissue of patients with or without COPD                                                                           | 8         |
| Human study populations                                                                                                                          | 8         |
| Definitions                                                                                                                                      | 8         |
| RNA extraction and real-time PCR-analysis                                                                                                        | 8         |
| Statistical analysis                                                                                                                             | 9         |
| <b>Supplemental results</b>                                                                                                                      | <b>10</b> |
| Haemoglobin-adjusted analysis                                                                                                                    | 10        |
| FEV <sub>1</sub> /FVC adjusted analysis                                                                                                          | 10        |
| Follow-up analyses                                                                                                                               | 10        |
| Genetic correlations                                                                                                                             | 10        |
| Overlap with reported COPD and emphysema GWAS associations                                                                                       | 11        |
| FINEMAP                                                                                                                                          | 12        |
| Functional annotation                                                                                                                            | 12        |
| ADGRG6 expression                                                                                                                                | 13        |
| <b>Supplementary tables and figures</b>                                                                                                          | <b>14</b> |
| Figure E1 Quantile-quantile plot at meta-analysis level                                                                                          | 15        |
| Table E1 Main results of the meta-analysis in the Rotterdam Study (RS)                                                                           | 16        |
| Table E2 Main results of the GWAS in the Framingham Heart Study (FHS)                                                                            | 18        |
| Table E3 Results of the meta-analysis in both cohorts; the Rotterdam Study and the Framingham Heart Study                                        | 19        |
| Figure E2 Double Manhattan-plot where results of the meta-analysis of DLCO/VA before and after adjustment with FEV <sub>1</sub> /FVC in model 2. | 23        |
| Table E4 Overlap with reported COPD-associated variants and those associated with DLCO in Model 1                                                | 24        |
| Table E5 Overlap with reported COPD-associated variants and those associated with DLCO in Model 2                                                | 26        |

|                                                                                                                               |           |
|-------------------------------------------------------------------------------------------------------------------------------|-----------|
| Table E6 Overlap with reported COPD-associated variants and those associated with DLCO/VA in Model 1                          | 28        |
| Table E7 Overlap with reported COPD-associated variants and those associated with DLCO/VA in Model 2                          | 30        |
| Table E8 Overlap with reported emphysema-associated variants and those associated with DLCO and DLCO/VA in the models 1 and 2 | 32        |
| Figure E3 Haploreg analysis of the main results of the meta-analysis                                                          | 33        |
| Figure E4 GTEx output of <i>ADGRG6</i> expression in different tissues                                                        | 35        |
| Figure E5 The genotypes of rs17280293 and rs11155242 in GTEx lung tissue database.                                            | 36        |
| <b>Supplemental references</b>                                                                                                | <b>37</b> |

## **Supplemental methods**

### **Rotterdam study**

The Rotterdam Study is an ongoing prospective population-based cohort study aimed at investigating the occurrence and risk factors of chronic diseases in the general population. The objectives and methods of the Rotterdam Study have been published previously (9). Briefly, the Rotterdam Study includes 3 cohorts encompassing 14,926 participants aged  $\geq 45$  years, living in Ommoord, a well-defined suburb of the city of Rotterdam, the Netherlands. Baseline data were collected between 1990 and 1993 ( $n = 7,983$ ), between 2000 and 2003 ( $n = 3,011$ ), and between 2006 and 2008 ( $n = 3,932$ ); thereafter, examinations have been conducted every 4 to 5 years in all cohorts. DLCO was measured between 2009-2013.

### **Framingham Heart Study**

In 1948, residents of Framingham, Massachusetts, were recruited for the first round of the Framingham Heart Study (FHS). The FHS Original Cohort included a total of 5,209 participants aged between 28 and 62 years. In 1971, the FHS Offspring Cohort was established, including 5,124 participants who were either the children of the Original Cohort or spouses. Finally, in 2002, the FHS Third Generation Cohorts was established, existing of 4,095 adults who were the children of the Offspring Cohort. DLCO was measured at the at the 8th and 9th examinations of the Offspring Cohort (2005-2008 and 2011-2014) and the 1st and 2nd examinations of the Third Generation Cohort (2002-2005 and 2008-2011). In addition to nuclear families, more distantly related individuals (e.g. cousins) were also included in the analyses. For participants with measurements at both time points, we used the later measurement in the analysis.

## **Lung function**

DLCO (mmol/min/kPA) measured using the single breath technique in accordance with ERS / ATS guidelines (1). The alveolar volume (VA) was measured simultaneously by the single-breath helium technique. The DLCO per alveolar volume (DLCO/VA (mmol/min/kPA/liter)) was calculated as the DLCO divided by the VA. In the Rotterdam Study, these measurements were made using Master Screen® PFT Pro (CareFusion, San Diego, CA). In the Framingham Heart Study, these measurements were made using the Collins CPL System (nSpire Health, Inc., Longmont, CO). For this study, analyses were restricted to participants with two interpretable and reproducible measurement. Two measurements were considered as reproducible if the difference between the first and the second DLCO (mmol/min/kPA) measurement was equal or less than 10% and if the difference between the first and the second DLCO/VA (mmol/min/kPA/L) measurement was equal or less than 15%. In addition, the inspiratory volume “VIN” measured in liter during the diffusion test must be greater than or equal to 85% of the personal best value of the inhaled vital capacity “VC IN” measured in liters during the spirometry test. In case VC is lacking, predicted volumes were used. Finally outliers, defined as the mean  $\pm$  4 standard deviations, were excluded from all analyses.

## **Genetics**

Rotterdam study participants were genotyped using the Illumina 550L, 550K duo or 610 quad arrays. Framingham participants were genotyped using the Affymetrix 500K array supplemented by the Affymetrix MIPS 50K. Samples with: call rate below 97.5% in Rotterdam and 97.0% in Framingham, gender mismatch, excess autosomal heterozygosity, duplicates or family relations (the Rotterdam Study only) and ethnic outliers were excluded. We also excluded variants with minor allele

frequency <1%, call rate <95% (the Rotterdam Study) or 97% (the Framingham Heart Study), failing missingness tests, Hardy-Weinberg equilibrium (p-value <  $10^{-6}$ ). Genotypes were imputed using MACH/minimac software to the 1000 Genomes reference panel (phase I version 3).

## **Heritability**

Heritability was defined as the ratio of trait variance due to additive genetic effects to the total phenotypic variance after accounting for covariates. To estimate heritability in unrelated individuals restricted maximum likelihood (REML) estimates were produced using the Genome-wide Complex Trait Analysis (GCTA) software (2). For this analysis, we filtered on allele frequency (MAF < 1%) and imputation quality ( $R^2 < 0.5$ ). Additional pair-wise calculations were performed to estimate genetic relatedness between all individuals. For each pair with genetic similarity of > 0.025, one person was excluded. To estimate heritability based on known familial relationships, the Sequential Oligogenic Linkage Analysis Routines (SOLAR) software (3) was used to compute the maximum likelihood estimates of heritability. In both heritability analyses (GCTA and SOLAR) an inverse normal rank transformation was performed on the DLCO and DLCO/VA measures to ensure a normal distribution of the phenotypes. Heritability analyses were adjusted for age, sex and principal components of genetic relatedness ((PC) in GCTA only). Additional adjustment for current and former smoking were done in a subsequent analysis.

## **Genetic correlations**

Genetic correlation analyses were performed using the LD score regression (4). We investigated the genetic correlation between DLCO and DLCO/VA (age-, sex- and

smoking, weight, height and PC-adjusted models). The phenotypic correlation between DLCO and DLCO/VA was also investigated using the Pearson correlation. In addition, we investigated the genetic correlation between DLCO and DLCO/VA and previously published GWAS of FEV<sub>1</sub>/FVC (5) and height (6). For the correlation with height age, sex and PC-adjusted model was used to estimate genetic overlap, and the fully adjusted model was used to investigate residual confounding by height. P-value of 0.05 was used as threshold of significance.

### **Overlap with reported COPD and emphysema GWAS associations**

We examined the association with DLCO and DLCO/VA of 79 genetic loci for which replicated genome wide significant associations with COPD have been reported (7). A P-value of  $0.05/79 = 6.3 \times 10^{-4}$  was used as the threshold of significance in this analysis. We also investigated the association with DLCO and DLCO/VA of 7 genetic loci of which genome-wide significant association with emphysema have been previously reported (8). A p-value of  $0.05/7 = 0.007$  was used as the threshold of significance.

### **FINEMAP**

We used FINEMAP (9) in order to calculate the posterior probability of the association on chromosome 6 being causal. Other than doing conditional association analysis to detect multiple signals at one locus, followed by an estimation of posterior probability of causality for each independent signal, this method uses the multiple causal variant assumption to calculate those probabilities efficiently and more accurately (10). For this analysis, we created the LD matrix from the Rotterdam Study cohort RS3 with  $n = 3,048$  individuals and we extracted a 6 mega base region centred on rs17280293 with 8,371 SNPs (MAF > 1%).

## **ADGRG6 mRNA expression in lung tissue of patients with or without COPD**

### **Human study populations**

Lung resection specimens were obtained from 92 patients, of which 78 from surgery for solitary pulmonary tumours (Ghent University Hospital, Ghent, Belgium) and 14 from explant lungs of end-stage COPD patients undergoing lung transplantation (University Hospital Gasthuisberg, Leuven, Belgium). Lung tissue at maximum distance from the pulmonary lesions and without signs of retro-obstructive pneumonia or tumour invasion was collected by a pathologist. None of the patients operated for malignancy were treated with neo-adjuvant chemotherapy. Written informed consent was obtained from all subjects. This study was approved by the medical ethical committees of the Ghent University Hospital (2011/14) and the University Hospital Gasthuisberg Leuven (S51577).

### **Definitions**

Smoking was categorized in never, former and current. Former-smokers were defined as being abstinent of smoking for at least one year. COPD diagnosis and severity was defined using pre-operative spirometry according to the Global Initiative for Chronic Obstructive Lung Disease (GOLD) classification 1. Median values were used to define DLCO categories.

### **RNA extraction and real-time PCR-analysis**

RNA was extracted with the miRNeasy Mini kit (Qiagen) from total lung tissue blocks submersed in RNA-later. cDNA was obtained by the miScript II RT kit (Qiagen), following manufacturer's instructions. Expression of target genes ADGRG6 (GPR126) and reference genes Glyceraldehyde-3-phosphate dehydrogenase (GAPDH), Hypoxanthine phosphoribosyltransferase-1 (HPRT-1) and Succinate Dehydrogenase Complex Flavoprotein Subunit A (SDHA) were analyzed using



Taqman Gene Expression Assays (Applied Biosystems, Forster City, CA, USA). Real-time PCR reactions were set up in duplicate using diluted cDNA using identical amplification conditions for each of the target and reference genes. A standard curve derived from serial dilutions of a mixture of all samples were included in each run. The amplification conditions consisted of: 10 minutes at 95°C and 60 cycles of 95°C for 10 seconds and 60°C for 15 seconds. Amplifications were performed using a LightCycler 96 detection system (Roche). Data were processed using the standard curve method. Expression of target genes was corrected by a normalization factor that was calculated based on the expression of three reference genes, using the geNorm applet according to the guidelines and theoretical framework previously described (11).

### **Statistical analysis**

Statistical analysis was performed with Sigma Stat software (SPSS 19.0, Chicago, IL, USA), using Kruskal-Wallis, Mann-Whitney U, Fisher's exact test and Spearman correlation analysis. Characteristics of the study population are expressed as median and interquartile range. Linear regression was used to test the association between mRNA expression as determinant and DLCO/VA. Analyses were adjusted for age and sex in model 1 and additionally for smoking, weight and height in model 2. P-value of lower than 0.05 was considered statistically significant.

## Supplemental results

### Haemoglobin-adjusted analysis

Measures of DLCO and DLCO/VA are affected by haemoglobin (Hb) levels, since low levels of Hb can underestimate the true diffusing capacity potential of the lung (12). Only in the Rotterdam Study, DLCO and DLCO/VA measures which were corrected for Hb levels, were available. As a sensitivity analysis, we performed GWAS with Hb-corrected data in Rotterdam study (n=2,573). This confirmed the results of the analyses without Hb-correction.

### FEV<sub>1</sub>/FVC adjusted analysis

A significant association between the observed association at 6q24.1 (rs17280293, gene: *ADGRG6*; MAF: 0.22, P-value=  $1.4 \times 10^{-10}$ ) and FEV<sub>1</sub>/FVC was recently identified; (13) therefore, as a sensitivity analysis, we performed the DLCO/VA GWAS, with additional adjustment for FEV<sub>1</sub>/FVC. This analysis, did not materially affect the association between rs17280293 and DLCO/VA (beta=-0.07 (SE: 0.01), P-value=  $1.51 \times 10^{-10}$ ) *versus* (beta=-0.07 (SE 0.01), P-value=  $7.9 \times 10^{-11}$  without adjustment for FEV<sub>1</sub>/FVC in model 2). **Figure E2** presents a double Manhattan plot with DLCO/VA before and after additional adjustment for FEV<sub>1</sub>/FVC.

## Follow-up analyses

### Genetic correlations

We examined the genetic correlation between DLCO/VA and DLCO using the age, sex, smoking status, weight, height and PC adjusted model. The genetic correlation was 59% (p<sub>genetic</sub>=0.59, P-value=0.04). We also examined the genetic correlation between DLCO and DLCO/VA and FEV<sub>1</sub>/FVC using the same model. Here we found no statistically significant genetic overlap between the traits. Finally, we examined the genetic correlation between the age-, sex- and PC-adjusted DLCO and

DLCO/VA and height. We found a significant genetic correlation between DLCO and height ( $\rho_{\text{genetic}}=0.63$ ,  $P\text{-value}=8.0\text{e-}4$ ), and between DLCO/VA and height ( $\rho_{\text{genetic}}=-0.16$ ,  $P\text{-value}=0.01$ ). We did not find a genetic correlation between DLCO and DLCO/VA and height in the age,sex, smoking status, weight, height and PC adjusted model.

### **Overlap with reported COPD and emphysema GWAS associations**

We investigated the overlap between replicated genome-wide significant variants associated with COPD (7) ( $n=74$ ) and variants associated with DLCO and DLCO/VA GWAS in both of our models (**Tables E4-E7** in the Online Data Supplement). Seven COPD-associated variants; rs9403391, rs13192074, rs11853359, rs9399401, rs2039987, rs1441358 and rs2415116 in the following gene regions RS11-440G9.1, ADGRG6 and THSD4 were significantly associated with DLCO/VA (**Tables E6 and E7** in the Online Data Supplement). No overlap was found between COPD-associated variants and those associated with DLCO.

We also investigated the association with DLCO and DLCO/VA of 7 genetic loci of which genome-wide significant association with emphysema have been previously reported (8), (since 7 out of 10 emphysema-associated variants were available in our results). No genetic overlap was found between the seven emphysema-associated variants and those associated with DLCO. Only one emphysema-related variant on chromosome 15 (rs55676755, gene: CHRNA3) was found to be also significantly associated with DLCO/VA (**Table E8** in the Online Data Supplement). Since variants in the CHRNA3 gene have been implicated in nicotine addiction, our study adds decreased DLCO/VA to the phenotypes associated with CHRNA3 genetic variation.

## FINEMAP

To identify whether the observed signal in chromosome 6 on DLCO/VA is driven by the lead variant or by other variants in the same locus, we calculated the posterior probability of causality for variants in that region using the FINEMAP software (9). The lead variant rs17280293 had a posterior probability of causality of 0.72, the highest probability among all SNPs in the same region on chromosome 6. Rs148274477 was ranked second; however, the probability of causality for this variant was only 0.18, indicating that the signal in this region on chromosome 6 is mainly driven by rs17280293.

## Functional annotation

Functional annotation of the variants of **Table 3** was performed in Haploreg. Haploreg analyses revealed several associations between regulatory chromatin marks, promotor histone marks, and enhancer histone marks with the SNPs in different tissue cell lines including foetal lung fibroblast cell lines and lung carcinoma cell lines (see **Figure E3** in the Online Data Supplement).

We also investigated in GTEx lung tissue database whether rs17280293 and the missense variant rs11155242 ( $D'=1$  with rs17280293) were associated with mRNA expression of *ADGRG6* (eQTL). Unfortunately, the minor allele count (MAC) of rs17280293 was very low (MAC=11) and therefore the results of the eQTL analysis for this SNP were considered unreliable. On the other hand, we found a significant association between rs11155242 and mRNA expression of *ADGRG6* (Variant ID: 6\_142691549\_A\_C\_b37,  $\beta = -0.10$ ,  $SE = 0.05$ ,  $p\text{-value} = 0.03$ , MAC=124). (See **Figure E5** in Online Data Supplement)

### ***ADGRG6* expression**

We checked the functionality of the *ADGRG6* gene in the Genotype-tissue expression (GTEx) portal, to identify tissue specific expression. *ADGRG6* showed to be highly expressed in the lung (n=427), with median expression of 19.26 reads per kilobase of transcript per million mapped reads (**Figure E4** in the Online Data Supplement). We additionally extracted mRNA from lung resection specimens of 92 patients who underwent surgery for solitary pulmonary tumours or lung transplantation, including 44 patients without COPD and 48 patients with COPD (**Table 4 in the main manuscript**). The mRNA expression of *ADGRG6* was significantly lower in lung tissue of patients with decreased DLCO/VA compared with patients with normal DLCO/VA (**Figure 5A in the main manuscript**) and in subjects with COPD (encompassing different categories of COPD severity according to the GOLD spirometric classification) compared to never smoking controls (**Figure 5B in the main manuscript**). The *ADGRG6* mRNA levels were significantly associated with DLCO/VA after adjustment for age and sex in model 1 (n=67  $\beta=0.85$  (95% CI 0.06-1.64)) and after additional adjustment for weight, height and smoking in model 2 n=66 ( $\beta=0.75$ (95% CI 0.03-1.47)).

## Supplementary tables and figures

**Figure E1** Quantile-quantile plot at meta-analysis level

**Table E1** Main results of the meta-analysis in the Rotterdam Study (RS)

**Table E2.** Main results of the GWAS in the Framingham Heart Study (FHS)

**Table E3** Results of the meta-analysis in both cohorts; the Rotterdam Study and the Framingham Heart Study

**Figure E2** Double Manhattan-plot where results of the meta-analysis of DLCO/VA before and after adjustment with FEV<sub>1</sub>/FVC in model 2

**Table E4** Overlap with reported COPD-associated variants and those associated with DLCO in Model 1

**Table E5** Overlap with reported COPD-associated variants and those associated with DLCO in Model 2

**Table E6** Overlap with reported COPD-associated variants and those associated with DLCO/VA in Model 1

**Table E7** Overlap with reported COPD-associated variants and those associated with DLCO/VA in Model 2

**Table E8** Overlap with reported emphysema-associated variants and those associated with DLCO and DLCO/VA in the models 1 and 2

**Figure E3** Haploreg analysis of the main results of the meta-analysis

**Figure E4** GTEx output of *ADGRG6* expression in different tissues

**Figure E5** The genotypes of rs17280293 and rs11155242 in GTEx lung tissue database.

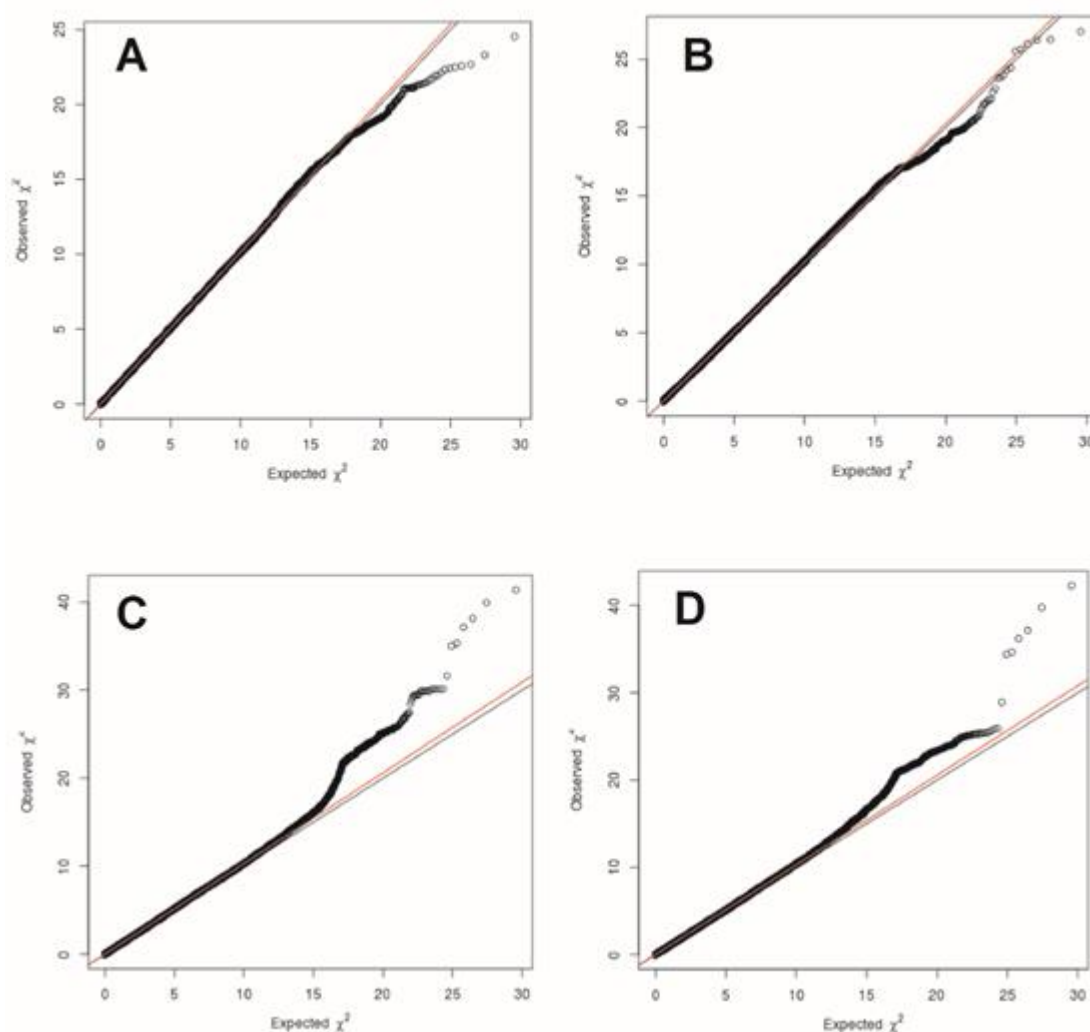

### Figure E1 Quantile-quantile plot at meta-analysis level

Quantile-quantile plot of the observed versus expected chi-square values under the null for A: DLCO; adjusted for age, sex and principle components. B: DLCO; adjusted for age, sex, weight, height, smoking, and principle components. C: DLCO/VA; adjusted for age, sex and principle components. D: DLCO/VA; adjusted for age, sex, weight, height, smoking, and principle components.

**Table E1 Main results of the meta-analysis in the Rotterdam Study (RS)**  
with N=2,574 and P-value < 5×10<sup>-6</sup>

| Trait_Model           | Marker Name         | A1 | A2    | Effect | SE     | P-value         | Chr | Pos       |
|-----------------------|---------------------|----|-------|--------|--------|-----------------|-----|-----------|
| <b>DLCO_model1</b>    | <b>rs7092290</b>    | c  | g     | 0.322  | 0.055  | <b>4.77E-09</b> | 10  | 127968283 |
|                       | <b>10-127968301</b> | a  | aaac  | -0.297 | 0.055  | <b>5.33E-08</b> | 10  | 127968301 |
|                       | <b>10-127968302</b> | a  | aac   | -0.296 | 0.055  | <b>7.49E-08</b> | 10  | 127968302 |
|                       | <b>rs3858318</b>    | a  | g     | -0.295 | 0.055  | <b>9.29E-08</b> | 10  | 127969267 |
|                       | rs6597758           | t  | c     | -0.292 | 0.056  | 1.42E-07        | 10  | 127964993 |
|                       | rs6597757           | c  | g     | 0.285  | 0.057  | 5.19E-07        | 10  | 127964653 |
|                       | rs7072808           | t  | c     | 0.283  | 0.057  | 6.08E-07        | 10  | 127964149 |
|                       | rs2886736           | a  | g     | 0.278  | 0.056  | 6.38E-07        | 10  | 127974346 |
|                       | rs182670994         | a  | c     | 3.379  | 0.682  | 7.33E-07        | 9   | 86169609  |
|                       | rs61773616          | t  | g     | -0.734 | 0.149  | 8.42E-07        | 1   | 73553643  |
|                       | rs61767582          | t  | c     | -0.722 | 0.146  | 8.59E-07        | 1   | 73586252  |
|                       | rs11816765          | t  | c     | 0.270  | 0.055  | 9.23E-07        | 10  | 127973248 |
|                       | rs7083626           | a  | c     | -0.261 | 0.053  | 9.97E-07        | 10  | 127975022 |
| <b>DLCO_model2</b>    | 12-69994371         | ct | c     | 0.191  | 0.037  | 1.78E-07        | 12  | 69994371  |
|                       | rs190691083         | c  | g     | 0.713  | 0.137  | 2.01E-07        | 22  | 42946620  |
|                       | rs7092290           | c  | g     | 0.259  | 0.050  | 2.51E-07        | 10  | 127968283 |
|                       | rs502736            | a  | g     | 0.178  | 0.035  | 3.32E-07        | 12  | 69922738  |
|                       | rs710761            | c  | g     | -0.184 | 0.036  | 3.80E-07        | 12  | 69997061  |
|                       | rs149201752         | c  | g     | -2.046 | 0.404  | 3.95E-07        | 1   | 234292220 |
|                       | rs115748414         | a  | g     | -0.674 | 0.133  | 4.40E-07        | 5   | 108757118 |
|                       | rs710763            | t  | g     | -0.182 | 0.036  | 4.51E-07        | 12  | 69995804  |
|                       | rs710768            | a  | t     | -0.182 | 0.036  | 4.54E-07        | 12  | 69990451  |
|                       | 12-70001814         | a  | aagtc | -0.176 | 0.035  | 4.89E-07        | 12  | 70001814  |
|                       | rs485288            | a  | g     | -0.182 | 0.036  | 5.09E-07        | 12  | 69980028  |
|                       | rs61929307          | T  | g     | 0.175  | 0.035  | 5.81E-07        | 12  | 69997422  |
|                       | rs484319            | C  | g     | -0.181 | 0.036  | 5.83E-07        | 12  | 69980141  |
|                       | rs710760            | A  | t     | 0.181  | 0.036  | 5.91E-07        | 12  | 69997067  |
|                       | rs710770            | T  | c     | -0.180 | 0.036  | 6.35E-07        | 12  | 69989730  |
|                       | rs710773            | A  | g     | -0.181 | 0.037  | 6.76E-07        | 12  | 69987494  |
|                       | rs550295            | A  | g     | -0.180 | 0.036  | 6.87E-07        | 12  | 69947351  |
|                       | rs528034            | A  | g     | -0.178 | 0.036  | 7.01E-07        | 12  | 69938534  |
|                       | rs39679             | A  | g     | 0.178  | 0.036  | 8.47E-07        | 12  | 70002265  |
|                       | rs74426828          | T  | c     | -0.648 | 0.132  | 9.07E-07        | 5   | 108722192 |
|                       | rs114218475         | T  | c     | 0.620  | 0.126  | 9.21E-07        | 5   | 108785530 |
|                       | rs710772            | A  | g     | -0.179 | 0.036  | 9.70E-07        | 12  | 69987968  |
| <b>DLCO/VA_model1</b> | -                   | -  | -     | -      | -      | -               | -   | -         |
| <b>DLCO/VA_model2</b> | rs146224372         | A  | g     | 0.263  | 0.050  | 1.74E-07        | 10  | 87181273  |
|                       | rs116995423         | C  | g     | -0.138 | 0.027  | 4.77E-07        | 21  | 24371855  |
|                       | rs12810179          | A  | c     | 0.033  | 0.007  | 6.08E-07        | 12  | 69172051  |
|                       | rs11939458          | T  | g     | -0.047 | 0.0096 | 8.61E-07        | 4   | 126268477 |
|                       | rs75346256          | C  | g     | 0.048  | 0.0097 | 8.69E-07        | 4   | 126266377 |



A1: first allele; A2: second allele; Chr: chromosome; DLCO: diffusing capacity of the lung for carbon monoxide; DLCO/VA: diffusing capacity of the lung for carbon monoxide per alveolar volume; RS: the Rotterdam Study; SE: Standard error; Pos: Position.

\*Model1: Adjusted for age, sex and principal components of genetic relatedness.

Model2: Adjusted for age, sex, weight, height, smoking and principal components of genetic relatedness.

**Table E2 Main results of the GWAS in the Framingham Heart Study (FHS)**  
with N=5,798 and P-value < 5×10<sup>-6</sup>

| Trait_Model           | Marker Name       | A1 | A2 | Effect | SE    | P-value         | Chr | Pos       |
|-----------------------|-------------------|----|----|--------|-------|-----------------|-----|-----------|
| <b>DLCO_model1</b>    | -                 | -  | -  | -      | -     | -               | -   | -         |
| <b>DLCO_model2</b>    | rs61779154        | A  | G  | 0.636  | 0.128 | 6.73E-07        | 1   | 40861949  |
|                       | rs61779153        | C  | T  | 0.617  | 0.126 | 9.45E-07        | 1   | 40861748  |
| <b>DLCO/VA_model1</b> | <b>rs17280293</b> | A  | G  | -0.076 | 0.013 | <b>6.69E-09</b> | 6   | 142688969 |
|                       | <b>rs9403386</b>  | A  | C  | -0.076 | 0.014 | <b>3.17E-08</b> | 6   | 142764073 |
|                       | rs9403391         | C  | T  | -0.067 | 0.012 | 7.02E-08        | 6   | 142814991 |
|                       | rs148274477       | C  | T  | -0.074 | 0.014 | 9.71E-08        | 6   | 142838173 |
|                       | rs73780219        | G  | A  | -0.066 | 0.013 | 1.41E-07        | 6   | 142722866 |
|                       | rs56315120        | G  | A  | 0.058  | 0.011 | 1.49E-07        | 1   | 165168869 |
|                       | rs73780221        | G  | C  | -0.066 | 0.013 | 1.64E-07        | 6   | 142725182 |
|                       | rs73840498        | G  | A  | -0.105 | 0.021 | 5.83E-07        | 4   | 112207301 |
|                       | rs16840542        | T  | C  | 0.044  | 0.009 | 7.74E-07        | 1   | 165143224 |
|                       | rs72700479        | C  | T  | 0.043  | 0.009 | 8.40E-07        | 1   | 165136095 |
|                       | rs2027573         | C  | T  | 0.043  | 0.009 | 8.51E-07        | 1   | 165137813 |
| <b>DLCO/VA_model2</b> | <b>rs17280293</b> | A  | G  | -0.073 | 0.012 | <b>2.32E-09</b> | 6   | 142688969 |
|                       | <b>rs9403386</b>  | A  | C  | -0.070 | 0.013 | <b>2.99E-08</b> | 6   | 142764073 |
|                       | rs9403391         | C  | T  | -0.063 | 0.012 | 5.28E-08        | 6   | 142814991 |
|                       | rs148274477       | C  | T  | -0.070 | 0.013 | 6.06E-08        | 6   | 142838173 |
|                       | rs73780219        | G  | A  | -0.062 | 0.012 | 1.35E-07        | 6   | 142722866 |
|                       | rs73780221        | G  | C  | -0.062 | 0.011 | 1.53E-07        | 6   | 142725182 |
|                       | rs73840498        | G  | A  | -0.101 | 0.020 | 2.12E-07        | 4   | 112207301 |
|                       | rs55861520        | C  | T  | -0.101 | 0.020 | 6.94E-07        | 16  | 77518045  |
|                       | rs79173154        | T  | A  | 0.064  | 0.013 | 7.39E-07        | 4   | 30664918  |
|                       | 16-83781200       | R  | D  | -0.039 | 0.009 | 8.84E-07        | 16  | 83781200  |

A1: first allele; A2: second allele; Chr: chromosome; DLCO: diffusing capacity of the lung for carbon monoxide; DLCO/VA: diffusing capacity of the lung for carbon monoxide per alveolar volume; FHS: Framingham Heart Study; SE: Standard error; Pos: Position.

\*Model1: Adjusted for age, sex and principal components of genetic relatedness.  
Model2: Adjusted for age, sex, weight, height, smoking and principal components of genetic relatedness.

**Table E3 Results of the meta-analysis in both cohorts; the Rotterdam Study and the Framingham Heart Study**  
with N=8,372 and P-value < 5×10<sup>-6</sup>

| Trait_Model           | Marker Name | A1  | A2    | Effect | SE       | P-value  | Chr | Pos       |
|-----------------------|-------------|-----|-------|--------|----------|----------|-----|-----------|
| <b>DLCO_model1</b>    | -           | -   | -     | -      | -        | -        | -   | -         |
| <b>DLCO_model2</b>    | rs1665696   | t   | c     | 0.10   | 2.07E-02 | 8.66E-07 | 10  | 73423190  |
|                       | rs1665631   | a   | g     | 0.10   | 2.06E-02 | 7.99E-07 | 10  | 73427057  |
|                       | rs1665630   | t   | c     | 0.11   | 2.07E-02 | 2.78E-07 | 10  | 73426862  |
|                       | rs2423124   | t   | c     | -0.16  | 3.10E-02 | 4.24E-07 | 20  | 5636945   |
|                       | rs1665698   | t   | g     | -0.11  | 2.10E-02 | 3.22E-07 | 10  | 73424602  |
|                       | rs1665627   | a   | g     | 0.11   | 2.07E-02 | 2.73E-07 | 10  | 73425183  |
| <b>DLCO/VA_model1</b> | rs12197866  | t   | c     | 0.02   | 4.60E-03 | 5.13E-07 | 6   | 142706063 |
|                       | rs4700499   | t   | c     | 0.02   | 3.90E-03 | 3.40E-07 | 5   | 61938132  |
|                       | rs6900087   | a   | t     | -0.02  | 4.60E-03 | 4.19E-07 | 6   | 142717303 |
|                       | rs7776356   | a   | g     | -0.02  | 4.50E-03 | 3.31E-08 | 6   | 142777029 |
|                       | rs6570509   | t   | g     | 0.02   | 4.00E-03 | 8.14E-07 | 6   | 142716286 |
|                       | rs34018047  | c   | g     | 0.02   | 4.50E-03 | 5.58E-08 | 6   | 142790873 |
|                       | rs7706610   | t   | c     | 0.02   | 3.90E-03 | 4.79E-07 | 5   | 61914033  |
|                       | 5-61756094  | ctt | c     | -0.02  | 3.90E-03 | 9.86E-07 | 5   | 61756094  |
|                       | 5-61594998  | t   | tttaa | 0.02   | 3.90E-03 | 9.43E-07 | 5   | 61594998  |
|                       | rs7735741   | t   | c     | 0.02   | 3.90E-03 | 4.03E-07 | 5   | 61930099  |
|                       | rs3817928   | a   | g     | -0.02  | 4.60E-03 | 2.02E-07 | 6   | 142750516 |
|                       | rs9389994   | t   | c     | 0.02   | 4.00E-03 | 7.33E-07 | 6   | 142789158 |
|                       | rs13198644  | a   | g     | -0.02  | 4.50E-03 | 3.93E-08 | 6   | 142783233 |
|                       | rs11759653  | a   | g     | 0.02   | 4.60E-03 | 4.05E-07 | 6   | 142720354 |
|                       | rs12189838  | a   | g     | -0.02  | 4.50E-03 | 4.12E-08 | 6   | 142768817 |
|                       | rs7754638   | a   | t     | -0.02  | 4.00E-03 | 6.33E-07 | 6   | 142780251 |
|                       | rs76308788  | t   | c     | -0.04  | 8.50E-03 | 6.63E-07 | 4   | 5231286   |
|                       | rs10044843  | a   | g     | -0.02  | 3.80E-03 | 8.80E-07 | 5   | 61606371  |
|                       | rs6903424   | a   | c     | -0.02  | 4.60E-03 | 5.52E-07 | 6   | 142699948 |
|                       | rs4700004   | a   | c     | -0.02  | 4.10E-03 | 5.76E-07 | 5   | 61560978  |
|                       | rs1329707   | t   | c     | -0.02  | 4.60E-03 | 3.41E-07 | 6   | 142724439 |
|                       | rs262118    | a   | c     | 0.02   | 4.70E-03 | 7.08E-07 | 6   | 142843054 |
|                       | rs171891    | a   | g     | 0.02   | 4.80E-03 | 6.56E-07 | 6   | 142850612 |
|                       | rs10054305  | a   | g     | 0.02   | 3.70E-03 | 8.69E-07 | 5   | 61899148  |
|                       | rs9403389   | t   | c     | 0.02   | 4.80E-03 | 7.76E-07 | 6   | 142789241 |
|                       | rs4700501   | a   | g     | -0.02  | 4.00E-03 | 2.79E-07 | 5   | 61953289  |
|                       | rs10053650  | a   | t     | 0.02   | 3.90E-03 | 2.47E-07 | 5   | 61938896  |
|                       | rs4637667   | a   | c     | 0.02   | 4.00E-03 | 8.86E-07 | 6   | 142794021 |
|                       | rs7729526   | t   | g     | -0.02  | 3.70E-03 | 8.55E-07 | 5   | 61907478  |
|                       | rs7735107   | t   | g     | 0.02   | 3.90E-03 | 3.40E-07 | 5   | 61929719  |
|                       | rs3817929   | c   | g     | 0.02   | 3.90E-03 | 5.69E-07 | 6   | 142751062 |
|                       | rs6922607   | a   | g     | -0.02  | 4.60E-03 | 8.63E-07 | 6   | 142703483 |
|                       | rs7717128   | a   | g     | -0.02  | 3.70E-03 | 8.52E-07 | 5   | 61894829  |
|                       | rs2344396   | a   | g     | 0.02   | 3.80E-03 | 9.73E-07 | 5   | 61605567  |
|                       | rs2112884   | a   | c     | -0.02  | 4.10E-03 | 8.39E-07 | 5   | 61551997  |
|                       | rs1040526   | a   | g     | -0.02  | 4.00E-03 | 6.18E-07 | 6   | 142735816 |
|                       | rs262113    | t   | g     | -0.02  | 4.60E-03 | 8.86E-08 | 6   | 142824950 |
|                       | rs9373346   | a   | g     | 0.02   | 3.90E-03 | 5.08E-07 | 6   | 142746992 |
|                       | rs1862569   | t   | c     | 0.02   | 3.90E-03 | 3.25E-07 | 5   | 61928513  |
|                       | rs12521329  | t   | c     | 0.02   | 3.90E-03 | 4.04E-07 | 5   | 61921815  |

|             |    |       |       |          |          |   |           |
|-------------|----|-------|-------|----------|----------|---|-----------|
| 6-142781102 | a  | attaa | -0.02 | 4.40E-03 | 7.96E-08 | 6 | 142781102 |
|             |    | g     |       |          |          |   |           |
| 5-61920308  | t  | tgag  | 0.02  | 3.90E-03 | 2.67E-07 | 5 | 61920308  |
| rs6937121   | t  | g     | -0.02 | 3.90E-03 | 7.95E-07 | 6 | 142707133 |
| rs4304190   | a  | g     | -0.02 | 4.50E-03 | 3.73E-08 | 6 | 142778912 |
| rs9496374   | c  | g     | 0.02  | 4.00E-03 | 6.04E-07 | 6 | 142735221 |
| rs1329705   | a  | g     | 0.02  | 4.60E-03 | 1.78E-07 | 6 | 142753338 |
| rs12664563  | a  | g     | -0.02 | 4.50E-03 | 4.06E-08 | 6 | 142785201 |
| rs10071568  | a  | c     | -0.02 | 3.70E-03 | 9.45E-07 | 5 | 61900149  |
| rs611802    | a  | c     | -0.02 | 4.00E-03 | 6.92E-07 | 6 | 142866387 |
| rs4700498   | a  | g     | 0.02  | 3.90E-03 | 5.11E-07 | 5 | 61937729  |
| rs2294771   | t  | g     | -0.02 | 4.00E-03 | 8.90E-07 | 6 | 142760962 |
| rs10051610  | t  | c     | 0.02  | 3.90E-03 | 3.26E-07 | 5 | 61931163  |
| rs73780221  | c  | g     | 0.06  | 1.08E-02 | 3.06E-09 | 6 | 142725182 |
| rs11155242  | a  | c     | -0.02 | 4.60E-03 | 4.25E-07 | 6 | 142691549 |
| rs6570511   | a  | g     | 0.02  | 4.50E-03 | 8.00E-08 | 6 | 142757368 |
| rs6888641   | a  | g     | 0.02  | 3.70E-03 | 5.89E-07 | 5 | 61920041  |
| rs1541677   | a  | c     | -0.02 | 3.70E-03 | 5.86E-07 | 5 | 61931563  |
| 5-61594993  | t  | tttta | 0.02  | 3.90E-03 | 7.69E-07 | 5 | 61594993  |
| rs6900233   | c  | g     | -0.02 | 4.60E-03 | 3.71E-07 | 6 | 142717283 |
| rs13185924  | c  | g     | -0.02 | 3.90E-03 | 5.51E-07 | 5 | 61920705  |
| rs10471545  | a  | g     | 0.02  | 3.80E-03 | 9.69E-07 | 5 | 61607268  |
| rs7757571   | a  | c     | -0.02 | 4.60E-03 | 5.04E-07 | 6 | 142702589 |
| rs962554    | t  | c     | -0.02 | 4.00E-03 | 4.11E-07 | 6 | 142734204 |
| rs1040525   | t  | c     | 0.02  | 4.00E-03 | 9.20E-07 | 6 | 142703669 |
| rs7709562   | a  | c     | -0.02 | 3.90E-03 | 3.24E-07 | 5 | 61928585  |
| 6-142704139 | g  | gt    | -0.02 | 4.60E-03 | 8.32E-07 | 6 | 142704139 |
| rs10072795  | t  | c     | 0.02  | 3.70E-03 | 7.10E-07 | 5 | 61926737  |
| rs12213892  | a  | g     | -0.02 | 4.60E-03 | 5.17E-07 | 6 | 142702234 |
| rs10078786  | t  | c     | 0.02  | 3.90E-03 | 3.10E-07 | 5 | 61940050  |
| rs148274477 | t  | c     | 0.08  | 1.22E-02 | 2.45E-10 | 6 | 142838173 |
| rs262117    | a  | g     | 0.03  | 4.50E-03 | 2.01E-08 | 6 | 142807093 |
| rs6901807   | t  | g     | 0.02  | 4.50E-03 | 3.57E-08 | 6 | 142772228 |
| 6-142830404 | a  | at    | 0.02  | 4.80E-03 | 3.03E-07 | 6 | 142830404 |
| rs2112982   | t  | c     | 0.02  | 3.90E-03 | 3.26E-07 | 5 | 61939973  |
| rs6906468   | t  | c     | -0.02 | 4.50E-03 | 3.03E-08 | 6 | 142769386 |
| rs6929442   | t  | c     | -0.02 | 3.90E-03 | 6.31E-07 | 6 | 142742659 |
| rs7765770   | t  | c     | 0.02  | 4.60E-03 | 4.57E-07 | 6 | 142687305 |
| rs56315120  | a  | g     | -0.05 | 9.30E-03 | 7.78E-07 | 1 | 165168869 |
| rs13167856  | a  | t     | -0.02 | 3.90E-03 | 3.96E-07 | 5 | 61920662  |
| rs262130    | t  | c     | 0.02  | 4.60E-03 | 1.73E-07 | 6 | 142853486 |
| rs918606    | a  | g     | -0.02 | 3.80E-03 | 5.96E-08 | 5 | 61926379  |
| rs73780219  | a  | g     | 0.06  | 1.07E-02 | 2.51E-09 | 6 | 142722866 |
| rs3748069   | a  | g     | -0.02 | 4.00E-03 | 5.34E-07 | 6 | 142767633 |
| rs2294775   | c  | g     | -0.02 | 4.50E-03 | 3.39E-08 | 6 | 142766347 |
| rs984932    | t  | c     | 0.02  | 4.40E-03 | 4.41E-07 | 6 | 142803037 |
| rs12190271  | a  | g     | 0.02  | 4.60E-03 | 6.18E-07 | 6 | 142681409 |
| rs13159750  | t  | c     | 0.02  | 3.80E-03 | 8.62E-07 | 5 | 61600316  |
| rs7776375   | a  | g     | -0.02 | 4.00E-03 | 6.46E-07 | 6 | 142777064 |
| rs262124    | a  | t     | -0.02 | 4.00E-03 | 7.77E-07 | 6 | 142838617 |
| rs10051492  | a  | g     | -0.02 | 3.80E-03 | 5.51E-07 | 5 | 61909886  |
| 5-61837343  | ca | c     | 0.02  | 3.90E-03 | 9.45E-07 | 5 | 61837343  |
| rs9403387   | t  | g     | 0.02  | 4.00E-03 | 6.04E-07 | 6 | 142773210 |
| rs77224873  | a  | g     | -0.04 | 8.40E-03 | 7.70E-07 | 4 | 5229518   |
| rs6912639   | t  | c     | -0.02 | 4.50E-03 | 3.06E-08 | 6 | 142770548 |

|                       |             |        |            |       |          |          |   |           |
|-----------------------|-------------|--------|------------|-------|----------|----------|---|-----------|
|                       | rs4700012   | a      | g          | -0.02 | 3.80E-03 | 6.36E-07 | 5 | 61906199  |
|                       | rs9403386   | a      | c          | -0.07 | 1.15E-02 | 1.17E-09 | 6 | 142764073 |
|                       | rs4037273   | t      | c          | 0.02  | 4.20E-03 | 8.27E-07 | 5 | 61549376  |
|                       | rs17071756  | t      | c          | -0.02 | 4.60E-03 | 5.96E-07 | 6 | 142715195 |
|                       | rs10065349  | t      | c          | 0.02  | 3.90E-03 | 5.36E-07 | 5 | 61912288  |
|                       | rs262125    | a      | t          | -0.03 | 4.70E-03 | 5.22E-08 | 6 | 142838355 |
|                       | rs17280293  | a      | g          | -0.07 | 1.13E-02 | 1.41E-10 | 6 | 142688969 |
|                       | rs9496369   | t      | c          | 0.02  | 4.00E-03 | 9.03E-07 | 6 | 142724918 |
|                       | rs9403391   | t      | c          | 0.07  | 1.08E-02 | 5.73E-10 | 6 | 142814991 |
|                       | rs6449601   | a      | g          | -0.02 | 3.70E-03 | 4.46E-07 | 5 | 61916333  |
|                       | rs10484733  | c      | g          | -0.02 | 4.60E-03 | 5.28E-07 | 6 | 142710988 |
|                       | rs9291756   | a      | g          | -0.02 | 4.10E-03 | 6.46E-07 | 5 | 61559700  |
|                       | rs13192074  | a      | g          | 0.03  | 6.00E-03 | 4.69E-08 | 6 | 142834078 |
|                       | 6-142738314 | cttctt | c          | -0.02 | 4.60E-03 | 3.12E-07 | 6 | 142738314 |
|                       | rs3846466   | t      | c          | 0.02  | 4.10E-03 | 9.28E-07 | 5 | 61558172  |
|                       | rs643975    | c      | g          | -0.02 | 4.60E-03 | 1.80E-07 | 6 | 142844251 |
|                       | rs40110     | a      | g          | 0.02  | 3.70E-03 | 8.87E-07 | 5 | 61763852  |
|                       | rs2294764   | a      | g          | 0.02  | 4.00E-03 | 5.60E-07 | 6 | 142737504 |
|                       | rs1928528   | t      | g          | -0.02 | 4.50E-03 | 3.74E-08 | 6 | 142779109 |
|                       | rs4290970   | t      | c          | 0.02  | 3.90E-03 | 9.94E-07 | 5 | 61602661  |
|                       | rs9373347   | t      | c          | 0.02  | 4.40E-03 | 7.84E-08 | 6 | 142779885 |
|                       | 6-142738312 | ctct   | c          | -0.02 | 5.00E-03 | 9.08E-07 | 6 | 142738312 |
|                       | rs75834976  | a      | c          | -0.04 | 8.40E-03 | 6.03E-07 | 4 | 5231710   |
|                       | rs7718484   | t      | c          | -0.02 | 3.80E-03 | 5.08E-07 | 5 | 61912713  |
|                       | rs26631     | t      | c          | -0.02 | 3.80E-03 | 9.61E-07 | 5 | 61768423  |
|                       | rs13176954  | c      | g          | -0.02 | 3.90E-03 | 2.29E-07 | 5 | 61941491  |
|                       | rs12516160  | a      | t          | 0.02  | 3.80E-03 | 6.98E-07 | 5 | 61900784  |
|                       | 6-142781103 | t      | ttaag<br>g | -0.02 | 4.60E-03 | 1.88E-07 | 6 | 142781103 |
|                       | rs262120    | a      | c          | 0.02  | 4.60E-03 | 1.78E-07 | 6 | 142842360 |
|                       | rs7756434   | a      | g          | -0.02 | 4.50E-03 | 3.31E-08 | 6 | 142775295 |
|                       | rs1360194   | a      | g          | 0.02  | 3.90E-03 | 5.87E-07 | 6 | 142752595 |
|                       | rs7755109   | a      | g          | -0.02 | 3.90E-03 | 6.23E-07 | 6 | 142750392 |
| <b>DLCO/VA_model2</b> | rs4700499   | t      | c          | 0.02  | 3.60E-03 | 5.41E-07 | 5 | 61938132  |
|                       | rs7776356   | a      | g          | -0.02 | 4.20E-03 | 4.80E-07 | 6 | 142777029 |
|                       | rs34018047  | c      | g          | 0.02  | 4.20E-03 | 6.89E-07 | 6 | 142790873 |
|                       | rs7706610   | t      | c          | 0.02  | 3.60E-03 | 8.60E-07 | 5 | 61914033  |
|                       | rs7735741   | t      | c          | 0.02  | 3.60E-03 | 7.34E-07 | 5 | 61930099  |
|                       | rs13198644  | a      | g          | -0.02 | 4.20E-03 | 5.53E-07 | 6 | 142783233 |
|                       | rs12189838  | a      | g          | -0.02 | 4.20E-03 | 7.34E-07 | 6 | 142768817 |
|                       | rs4700004   | a      | c          | -0.02 | 3.80E-03 | 9.37E-07 | 5 | 61560978  |
|                       | rs4700501   | a      | g          | -0.02 | 3.80E-03 | 6.22E-07 | 5 | 61953289  |
|                       | rs10053650  | a      | t          | 0.02  | 3.60E-03 | 4.87E-07 | 5 | 61938896  |
|                       | rs7735107   | t      | g          | 0.02  | 3.60E-03 | 6.03E-07 | 5 | 61929719  |
|                       | rs262113    | t      | g          | -0.02 | 4.30E-03 | 5.00E-07 | 6 | 142824950 |
|                       | rs9373346   | a      | g          | 0.02  | 3.70E-03 | 9.96E-07 | 6 | 142746992 |
|                       | rs1862569   | t      | c          | 0.02  | 3.60E-03 | 6.15E-07 | 5 | 61928513  |
|                       | rs12521329  | t      | c          | 0.02  | 3.60E-03 | 7.19E-07 | 5 | 61921815  |
|                       | 5-61920308  | t      | tgag       | 0.02  | 3.70E-03 | 5.74E-07 | 5 | 61920308  |
|                       | rs4304190   | a      | g          | -0.02 | 4.20E-03 | 5.32E-07 | 6 | 142778912 |
|                       | rs9496374   | c      | g          | 0.02  | 3.70E-03 | 9.90E-07 | 6 | 142735221 |
|                       | rs12664563  | a      | g          | -0.02 | 4.20E-03 | 5.64E-07 | 6 | 142785201 |
|                       | rs611802    | a      | c          | -0.02 | 3.80E-03 | 8.72E-07 | 6 | 142866387 |
|                       | rs10051610  | t      | c          | 0.02  | 3.60E-03 | 5.74E-07 | 5 | 61931163  |

|             |   |   |       |          |          |   |           |
|-------------|---|---|-------|----------|----------|---|-----------|
| rs73780221  | c | g | 0.06  | 1.01E-02 | 4.44E-09 | 6 | 142725182 |
| rs962554    | t | c | -0.02 | 3.70E-03 | 8.32E-07 | 6 | 142734204 |
| rs7709562   | a | c | -0.02 | 3.60E-03 | 6.13E-07 | 5 | 61928585  |
| rs10078786  | t | c | 0.02  | 3.60E-03 | 4.95E-07 | 5 | 61940050  |
| rs148274477 | t | c | 0.07  | 1.14E-02 | 2.85E-10 | 6 | 142838173 |
| rs262117    | a | g | 0.02  | 4.20E-03 | 3.62E-07 | 6 | 142807093 |
| rs6901807   | t | g | 0.02  | 4.20E-03 | 4.43E-07 | 6 | 142772228 |
| rs2112982   | t | c | 0.02  | 3.60E-03 | 5.15E-07 | 5 | 61939973  |
| rs6906468   | t | c | -0.02 | 4.20E-03 | 4.64E-07 | 6 | 142769386 |
| rs13167856  | a | t | -0.02 | 3.60E-03 | 7.07E-07 | 5 | 61920662  |
| rs262130    | t | c | 0.02  | 4.30E-03 | 9.28E-07 | 6 | 142853486 |
| rs918606    | a | g | -0.02 | 3.60E-03 | 7.49E-08 | 5 | 61926379  |
| rs73780219  | a | g | 0.06  | 1.00E-02 | 3.92E-09 | 6 | 142722866 |
| rs2294775   | c | g | -0.02 | 4.20E-03 | 4.08E-07 | 6 | 142766347 |
| rs10051492  | a | g | -0.02 | 3.60E-03 | 9.81E-07 | 5 | 61909886  |
| rs6912639   | t | c | -0.02 | 4.20E-03 | 4.66E-07 | 6 | 142770548 |
| rs9403386   | a | c | -0.06 | 1.08E-02 | 1.77E-09 | 6 | 142764073 |
| rs262125    | a | t | -0.02 | 4.40E-03 | 3.58E-07 | 6 | 142838355 |
| rs17280293  | a | g | -0.07 | 1.06E-02 | 7.85E-11 | 6 | 142688969 |
| rs9403391   | t | c | 0.06  | 1.01E-02 | 1.09E-09 | 6 | 142814991 |
| rs643975    | c | g | -0.02 | 4.30E-03 | 9.89E-07 | 6 | 142844251 |
| rs1928528   | t | g | -0.02 | 4.20E-03 | 5.33E-07 | 6 | 142779109 |
| rs7718484   | t | c | -0.02 | 3.60E-03 | 9.03E-07 | 5 | 61912713  |
| rs13176954  | c | g | -0.02 | 3.60E-03 | 4.52E-07 | 5 | 61941491  |
| rs262120    | a | c | 0.02  | 4.30E-03 | 9.82E-07 | 6 | 142842360 |
| rs7756434   | a | g | -0.02 | 4.20E-03 | 4.86E-07 | 6 | 142775295 |

A1: first allele; A2: second allele; Chr: chromosome; DLCO: diffusing capacity of the lung for carbon monoxide; DLCO/VA: diffusing capacity of the lung for carbon monoxide per alveolar volume; SE: Standard error; Pos: Position.

\*Model1: Adjusted for age, sex and principal components of genetic relatedness.

Model2: Adjusted for age, sex, weight, height, smoking and principal components of genetic relatedness.

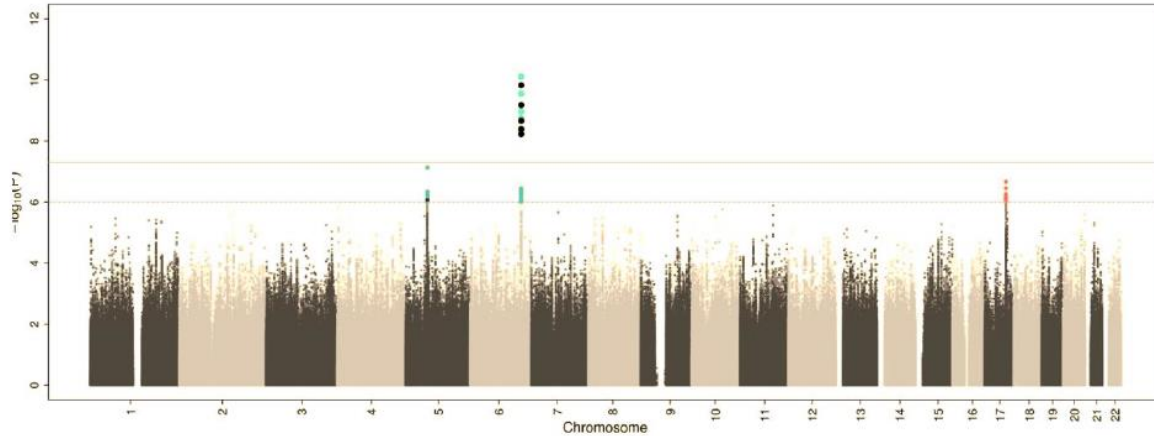

**Figure E2 Double Manhattan-plot where results of the meta-analysis of DLCO/VA before and after adjustment with FEV<sub>1</sub>/FVC in model 2.**

For variants with P-value lower than  $5 \times 10^{-6}$ , the blue colour represents a more significant association before adjustment compared to the black dots below which represent the same associations with a less significant P-value after adjustment with FEV<sub>1</sub>/FVC. The red colour represents a more significant association after adjustment with FEV<sub>1</sub>/FVC compared to the black dots below which represent the same associations with a less significant p-value before adjustment with FEV<sub>1</sub>/FVC.

Model 2: Adjusted for age, sex, weight, height, smoking and principal components of genetic relatedness.

**Table E4 Overlap with reported COPD-associated variants and those associated with DLCO in Model 1**

| Marker Name | A1 | A2 | Effect | SE    | P-value | Chr | Pos       |
|-------------|----|----|--------|-------|---------|-----|-----------|
| rs9403391   | t  | c  | 0.169  | 0.068 | 0.014   | 6   | 142814991 |
| rs17486278  | a  | c  | 0.056  | 0.025 | 0.022   | 15  | 78867482  |
| rs11853359  | a  | g  | -0.054 | 0.024 | 0.025   | 15  | 71621524  |
| rs1441358   | t  | g  | 0.052  | 0.024 | 0.031   | 15  | 71612514  |
| rs72811310  | t  | g  | -0.073 | 0.036 | 0.044   | 5   | 156948318 |
| rs10815649  | t  | c  | 0.055  | 0.028 | 0.051   | 9   | 7620482   |
| rs4742382   | a  | g  | 0.054  | 0.028 | 0.056   | 9   | 7620040   |
| rs647097    | t  | c  | 0.048  | 0.025 | 0.058   | 18  | 8808464   |
| rs2415116   | t  | c  | -0.050 | 0.027 | 0.068   | 15  | 71673185  |
| rs754388    | c  | g  | -0.053 | 0.032 | 0.090   | 14  | 93115410  |
| rs2076295   | t  | g  | 0.035  | 0.023 | 0.131   | 6   | 7563232   |
| rs4597955   | a  | g  | -0.040 | 0.027 | 0.136   | 5   | 147847273 |
| rs631126    | t  | c  | -0.039 | 0.027 | 0.145   | 18  | 8800723   |
| rs2806356   | t  | c  | -0.043 | 0.029 | 0.145   | 6   | 109266255 |
| rs16891339  | a  | g  | 0.092  | 0.066 | 0.163   | 6   | 80647622  |
| rs78242330  | t  | c  | -0.068 | 0.052 | 0.192   | 14  | 93111715  |
| rs7733401   | a  | c  | -0.032 | 0.026 | 0.228   | 5   | 147833281 |
| rs6058526   | a  | g  | -0.040 | 0.034 | 0.235   | 20  | 30699632  |
| rs36110266  | a  | g  | 0.040  | 0.034 | 0.235   | 20  | 30695031  |
| rs2034241   | a  | g  | 0.035  | 0.029 | 0.236   | 5   | 65085330  |
| rs6908022   | a  | t  | 0.046  | 0.041 | 0.262   | 6   | 96480212  |
| rs10429950  | t  | c  | -0.027 | 0.026 | 0.294   | 1   | 218624533 |
| rs4904964   | a  | c  | -0.027 | 0.026 | 0.300   | 14  | 93099867  |
| rs4846479   | t  | g  | 0.026  | 0.026 | 0.309   | 1   | 218598410 |
| rs11168048  | t  | c  | 0.023  | 0.024 | 0.331   | 5   | 147842353 |
| rs7727161   | t  | g  | -0.025 | 0.026 | 0.335   | 5   | 147832486 |
| rs60708069  | t  | g  | -0.030 | 0.033 | 0.354   | 5   | 147837664 |
| rs7733088   | a  | g  | -0.023 | 0.026 | 0.369   | 5   | 147856333 |
| rs11628180  | a  | g  | 0.024  | 0.027 | 0.370   | 14  | 93068516  |
| rs55724484  | a  | g  | 0.022  | 0.025 | 0.371   | 3   | 75380823  |
| rs11905172  | t  | c  | -0.027 | 0.032 | 0.393   | 20  | 30797628  |
| rs16825267  | c  | g  | 0.035  | 0.045 | 0.430   | 2   | 229569919 |
| rs13192074  | a  | g  | 0.030  | 0.038 | 0.432   | 6   | 142834078 |
| rs2843016   | a  | g  | -0.020 | 0.026 | 0.434   | 1   | 120322961 |
| rs13141641  | t  | c  | 0.018  | 0.024 | 0.461   | 4   | 145506456 |
| rs1435867   | t  | c  | 0.035  | 0.048 | 0.463   | 2   | 229510929 |
| rs2955083   | a  | t  | 0.026  | 0.036 | 0.464   | 3   | 127961178 |
| rs6087358   | a  | g  | 0.025  | 0.035 | 0.464   | 20  | 30855746  |
| rs113554904 | a  | g  | 0.019  | 0.027 | 0.466   | 3   | 188483788 |
| rs17707300  | t  | c  | -0.017 | 0.024 | 0.475   | 16  | 28593347  |
| rs56168343  | t  | c  | -0.022 | 0.031 | 0.475   | 5   | 156928008 |
| rs1737890   | t  | g  | 0.024  | 0.034 | 0.477   | 20  | 31042595  |
| rs9399401   | t  | c  | -0.018 | 0.026 | 0.479   | 6   | 142668901 |



|             |   |   |        |       |       |    |           |
|-------------|---|---|--------|-------|-------|----|-----------|
| rs2999090   | a | g | 0.025  | 0.036 | 0.489 | 3  | 127931340 |
| rs7937      | t | c | -0.016 | 0.024 | 0.497 | 19 | 41302706  |
| rs2582790   | a | c | -0.017 | 0.025 | 0.502 | 1  | 120314849 |
| rs2039987   | a | c | -0.017 | 0.026 | 0.506 | 6  | 142655490 |
| rs7186831   | a | g | 0.019  | 0.029 | 0.512 | 16 | 75473155  |
| rs6837671   | a | g | 0.015  | 0.024 | 0.527 | 4  | 89873092  |
| rs9396712   | t | c | 0.016  | 0.026 | 0.547 | 6  | 16818625  |
| rs13080090  | t | g | 0.021  | 0.036 | 0.567 | 3  | 171974838 |
| rs56308303  | t | c | 0.013  | 0.024 | 0.569 | 15 | 71669872  |
| rs185212652 | a | t | -0.019 | 0.035 | 0.575 | 5  | 147837533 |
| rs112458284 | t | c | -0.049 | 0.089 | 0.582 | 14 | 94672731  |
| rs11904894  | t | c | -0.014 | 0.026 | 0.584 | 20 | 19056247  |
| rs721917    | a | g | -0.013 | 0.023 | 0.584 | 10 | 81706324  |
| rs75720504  | a | c | 0.022  | 0.047 | 0.643 | 5  | 156935973 |
| rs12435118  | t | c | 0.016  | 0.036 | 0.653 | 14 | 102673993 |
| rs6573633   | a | g | -0.010 | 0.023 | 0.656 | 14 | 66272664  |
| rs3782563   | a | g | -0.010 | 0.024 | 0.660 | 12 | 96639739  |
| rs12459249  | t | c | 0.011  | 0.027 | 0.692 | 19 | 41339896  |
| rs1265120   | a | c | 0.010  | 0.024 | 0.692 | 8  | 103190071 |
| rs1265122   | t | c | 0.009  | 0.024 | 0.717 | 8  | 103190530 |
| rs12189594  | t | g | 0.008  | 0.023 | 0.735 | 6  | 14856357  |
| rs192394604 | t | g | -0.009 | 0.026 | 0.739 | 8  | 103148763 |
| rs1568010   | t | g | 0.007  | 0.024 | 0.765 | 15 | 71668512  |
| rs17035917  | t | c | -0.013 | 0.045 | 0.769 | 4  | 106520742 |
| rs58873874  | t | c | 0.013  | 0.047 | 0.783 | 5  | 156945148 |
| rs28929474  | t | c | -0.023 | 0.090 | 0.796 | 14 | 94844947  |
| rs1529672   | a | c | 0.008  | 0.031 | 0.803 | 3  | 25520582  |
| rs11727735  | a | g | 0.005  | 0.045 | 0.904 | 4  | 106631870 |
| rs13147502  | a | g | 0.002  | 0.024 | 0.950 | 4  | 106143797 |
| rs2047409   | a | g | -0.001 | 0.024 | 0.951 | 4  | 106137033 |

A1: first allele; A2: second allele; Chr: chromosome; DLCO: Diffusing capacity of the lung for carbon monoxide; SE: Standard error; Pos: Position.

Model1: Adjusted for age, sex and principal components of genetic relatedness.

**Table E5 Overlap with reported COPD-associated variants and those associated with DLCO in Model 2**

| Marker Name | A1 | A2 | Effect | SE    | P-value | Chr | Pos       |
|-------------|----|----|--------|-------|---------|-----|-----------|
| rs11853359  | a  | g  | -0.056 | 0.022 | 0.009   | 15  | 71621524  |
| rs754388    | c  | g  | -0.073 | 0.028 | 0.009   | 14  | 93115410  |
| rs72811310  | t  | g  | -0.081 | 0.033 | 0.012   | 5   | 156948318 |
| rs9403391   | t  | c  | 0.152  | 0.061 | 0.013   | 6   | 142814991 |
| rs1441358   | t  | g  | 0.053  | 0.022 | 0.014   | 15  | 71612514  |
| rs10815649  | t  | c  | 0.060  | 0.025 | 0.017   | 9   | 7620482   |
| rs4742382   | a  | g  | 0.058  | 0.025 | 0.021   | 9   | 7620040   |
| rs17486278  | a  | c  | 0.050  | 0.022 | 0.022   | 15  | 78867482  |
| rs78242330  | t  | c  | -0.106 | 0.047 | 0.023   | 14  | 93111715  |
| rs2415116   | t  | c  | -0.049 | 0.024 | 0.045   | 15  | 71673185  |
| rs647097    | t  | c  | 0.041  | 0.023 | 0.070   | 18  | 8808464   |
| rs2039987   | a  | c  | -0.040 | 0.023 | 0.078   | 6   | 142655490 |
| rs9399401   | t  | c  | -0.040 | 0.023 | 0.082   | 6   | 142668901 |
| rs28929474  | t  | c  | -0.139 | 0.081 | 0.085   | 14  | 94844947  |
| rs631126    | t  | c  | -0.040 | 0.024 | 0.092   | 18  | 8800723   |
| rs55724484  | a  | g  | 0.033  | 0.022 | 0.136   | 3   | 75380823  |
| rs4904964   | a  | c  | -0.034 | 0.023 | 0.143   | 14  | 93099867  |
| rs17035917  | t  | c  | -0.059 | 0.041 | 0.148   | 4   | 106520742 |
| rs11628180  | a  | g  | 0.034  | 0.024 | 0.166   | 14  | 93068516  |
| rs11727735  | a  | g  | 0.055  | 0.040 | 0.171   | 4   | 106631870 |
| rs4597955   | a  | g  | -0.028 | 0.024 | 0.236   | 5   | 147847273 |
| rs13141641  | t  | c  | 0.025  | 0.021 | 0.237   | 4   | 145506456 |
| rs2076295   | t  | g  | 0.024  | 0.020 | 0.239   | 6   | 7563232   |
| rs13192074  | a  | g  | 0.040  | 0.034 | 0.245   | 6   | 142834078 |
| rs2034241   | a  | g  | 0.030  | 0.026 | 0.249   | 5   | 65085330  |
| rs11904894  | t  | c  | -0.026 | 0.024 | 0.275   | 20  | 19056247  |
| rs7733401   | a  | c  | -0.025 | 0.024 | 0.280   | 5   | 147833281 |
| rs6908022   | a  | t  | 0.037  | 0.037 | 0.310   | 6   | 96480212  |
| rs6058526   | a  | g  | -0.031 | 0.030 | 0.311   | 20  | 30699632  |
| rs36110266  | a  | g  | 0.031  | 0.030 | 0.312   | 20  | 30695031  |
| rs2843016   | a  | g  | -0.023 | 0.023 | 0.315   | 1   | 120322961 |
| rs2582790   | a  | c  | -0.023 | 0.023 | 0.318   | 1   | 120314849 |
| rs12459249  | t  | c  | 0.024  | 0.025 | 0.331   | 19  | 41339896  |
| rs11905172  | t  | c  | -0.027 | 0.029 | 0.341   | 20  | 30797628  |
| rs10429950  | t  | c  | -0.021 | 0.023 | 0.354   | 1   | 218624533 |
| rs9396712   | t  | c  | 0.021  | 0.023 | 0.360   | 6   | 16818625  |
| rs4846479   | t  | g  | 0.021  | 0.023 | 0.373   | 1   | 218598410 |
| rs7937      | t  | c  | -0.019 | 0.021 | 0.375   | 19  | 41302706  |
| rs2806356   | t  | c  | -0.023 | 0.026 | 0.386   | 6   | 109266255 |
| rs7727161   | t  | g  | -0.019 | 0.024 | 0.410   | 5   | 147832486 |
| rs1737890   | t  | g  | 0.024  | 0.031 | 0.434   | 20  | 31042595  |
| rs56168343  | t  | c  | -0.021 | 0.027 | 0.444   | 5   | 156928008 |
| rs6837671   | a  | g  | 0.015  | 0.021 | 0.468   | 4   | 89873092  |

|             |   |   |        |       |       |    |           |
|-------------|---|---|--------|-------|-------|----|-----------|
| rs3782563   | a | g | -0.015 | 0.021 | 0.486 | 12 | 96639739  |
| rs75720504  | a | c | 0.029  | 0.042 | 0.494 | 5  | 156935973 |
| rs2955083   | a | t | 0.022  | 0.032 | 0.495 | 3  | 127961178 |
| rs12189594  | t | g | 0.014  | 0.021 | 0.495 | 6  | 14856357  |
| rs2999090   | a | g | 0.021  | 0.032 | 0.509 | 3  | 127931340 |
| rs112458284 | t | c | 0.051  | 0.079 | 0.521 | 14 | 94672731  |
| rs192394604 | t | g | -0.014 | 0.023 | 0.554 | 8  | 103148763 |
| rs12435118  | t | c | 0.019  | 0.032 | 0.555 | 14 | 102673993 |
| rs58873874  | t | c | 0.024  | 0.042 | 0.560 | 5  | 156945148 |
| rs11168048  | t | c | 0.012  | 0.022 | 0.572 | 5  | 147842353 |
| rs1529672   | a | c | 0.016  | 0.028 | 0.573 | 3  | 25520582  |
| rs113554904 | a | g | 0.013  | 0.024 | 0.582 | 3  | 188483788 |
| rs56308303  | t | c | 0.011  | 0.021 | 0.585 | 15 | 71669872  |
| rs17707300  | t | c | -0.011 | 0.021 | 0.593 | 16 | 28593347  |
| rs7186831   | a | g | 0.014  | 0.026 | 0.601 | 16 | 75473155  |
| rs721917    | a | g | 0.010  | 0.021 | 0.617 | 10 | 81706324  |
| rs6087358   | a | g | 0.015  | 0.031 | 0.622 | 20 | 30855746  |
| rs6573633   | a | g | 0.010  | 0.021 | 0.634 | 14 | 66272664  |
| rs7733088   | a | g | -0.011 | 0.023 | 0.636 | 5  | 147856333 |
| rs60708069  | t | g | -0.010 | 0.029 | 0.737 | 5  | 147837664 |
| rs13147502  | a | g | 0.006  | 0.021 | 0.774 | 4  | 106143797 |
| rs16825267  | c | g | 0.010  | 0.040 | 0.813 | 2  | 229569919 |
| rs1568010   | t | g | 0.004  | 0.021 | 0.852 | 15 | 71668512  |
| rs1435867   | t | c | 0.008  | 0.043 | 0.855 | 2  | 229510929 |
| rs13080090  | t | g | -0.006 | 0.032 | 0.866 | 3  | 171974838 |
| rs2047409   | a | g | 0.003  | 0.021 | 0.876 | 4  | 106137033 |
| rs185212652 | a | t | -0.004 | 0.031 | 0.888 | 5  | 147837533 |
| rs16891339  | a | g | 0.008  | 0.059 | 0.889 | 6  | 80647622  |
| rs1265122   | t | c | 0.003  | 0.022 | 0.899 | 8  | 103190530 |
| rs1265120   | a | c | 0.003  | 0.021 | 0.903 | 8  | 103190071 |

A1: first allele; A2: second allele; Chr: chromosome; DLCO: Diffusing capacity of the lung for carbon monoxide; SE: Standard error; Pos: Position.

\* Model2: Adjusted for age, sex, weight, height, smoking and principal components of genetic relatedness.

**Table E6 Overlap with reported COPD-associated variants and those associated with DLCO/VA in Model 1**

| Marker Name | A1 | A2 | Effect | SE    | P-value  | Chr | Pos       |
|-------------|----|----|--------|-------|----------|-----|-----------|
| rs9403391   | t  | c  | 0.067  | 0.011 | 5.73E-10 | 6   | 142814991 |
| rs13192074  | a  | g  | 0.033  | 0.006 | 4.69E-08 | 6   | 142834078 |
| rs11853359  | a  | g  | -0.017 | 0.004 | 1.01E-05 | 15  | 71621524  |
| rs9399401   | t  | c  | -0.018 | 0.004 | 1.06E-05 | 6   | 142668901 |
| rs2039987   | a  | c  | -0.018 | 0.004 | 1.64E-05 | 6   | 142655490 |
| rs1441358   | t  | g  | 0.016  | 0.004 | 3.37E-05 | 15  | 71612514  |
| rs2415116   | t  | c  | -0.016 | 0.004 | 2.20E-04 | 15  | 71673185  |
| rs17486278  | a  | c  | 0.012  | 0.004 | 0.0028   | 15  | 78867482  |
| rs112458284 | t  | c  | 0.036  | 0.014 | 0.010    | 14  | 94672731  |
| rs72811310  | t  | g  | -0.015 | 0.006 | 0.011    | 5   | 156948318 |
| rs28929474  | t  | c  | -0.035 | 0.014 | 0.015    | 14  | 94844947  |
| rs55724484  | a  | g  | 0.009  | 0.004 | 0.028    | 3   | 75380823  |
| rs11905172  | t  | c  | -0.010 | 0.005 | 0.049    | 20  | 30797628  |
| rs2955083   | a  | t  | 0.011  | 0.006 | 0.059    | 3   | 127961178 |
| rs2999090   | a  | g  | 0.011  | 0.006 | 0.064    | 3   | 127931340 |
| rs17707300  | t  | c  | -0.007 | 0.004 | 0.080    | 16  | 28593347  |
| rs56308303  | t  | c  | 0.007  | 0.004 | 0.080    | 15  | 71669872  |
| rs6837671   | a  | g  | 0.006  | 0.004 | 0.093    | 4   | 89873092  |
| rs11727735  | a  | g  | 0.011  | 0.007 | 0.109    | 4   | 106631870 |
| rs13080090  | t  | g  | 0.009  | 0.006 | 0.110    | 3   | 171974838 |
| rs2034241   | a  | g  | 0.007  | 0.005 | 0.121    | 5   | 65085330  |
| rs36110266  | a  | g  | 0.008  | 0.005 | 0.128    | 20  | 30695031  |
| rs7937      | t  | c  | 0.006  | 0.004 | 0.130    | 19  | 41302706  |
| rs6058526   | a  | g  | -0.008 | 0.005 | 0.132    | 20  | 30699632  |
| rs6087358   | a  | g  | 0.008  | 0.006 | 0.171    | 20  | 30855746  |
| rs6573633   | a  | g  | -0.005 | 0.004 | 0.180    | 14  | 66272664  |
| rs17035917  | t  | c  | -0.009 | 0.007 | 0.208    | 4   | 106520742 |
| rs1568010   | t  | g  | 0.004  | 0.004 | 0.259    | 15  | 71668512  |
| rs10815649  | t  | c  | 0.005  | 0.005 | 0.266    | 9   | 7620482   |
| rs1737890   | t  | g  | 0.006  | 0.006 | 0.279    | 20  | 31042595  |
| rs4742382   | a  | g  | 0.005  | 0.005 | 0.283    | 9   | 7620040   |
| rs1529672   | a  | c  | 0.005  | 0.005 | 0.296    | 3   | 25520582  |
| rs6908022   | a  | t  | 0.007  | 0.007 | 0.308    | 6   | 96480212  |
| rs2076295   | t  | g  | -0.004 | 0.004 | 0.326    | 6   | 7563232   |
| rs12189594  | t  | g  | 0.003  | 0.004 | 0.367    | 6   | 14856357  |
| rs2806356   | t  | c  | -0.004 | 0.005 | 0.369    | 6   | 109266255 |
| rs7186831   | a  | g  | -0.004 | 0.005 | 0.379    | 16  | 75473155  |
| rs7733088   | a  | g  | 0.003  | 0.004 | 0.412    | 5   | 147856333 |
| rs58873874  | t  | c  | -0.006 | 0.007 | 0.413    | 5   | 156945148 |
| rs75720504  | a  | c  | -0.006 | 0.007 | 0.417    | 5   | 156935973 |
| rs721917    | a  | g  | -0.003 | 0.004 | 0.437    | 10  | 81706324  |
| rs11904894  | t  | c  | 0.003  | 0.004 | 0.454    | 20  | 19056247  |
| rs4904964   | a  | c  | 0.003  | 0.004 | 0.460    | 14  | 93099867  |

|             |   |   |        |       |       |    |           |
|-------------|---|---|--------|-------|-------|----|-----------|
| rs185212652 | a | t | 0.004  | 0.006 | 0.479 | 5  | 147837533 |
| rs113554904 | a | g | 0.003  | 0.004 | 0.497 | 3  | 188483788 |
| rs2582790   | a | c | 0.003  | 0.004 | 0.503 | 1  | 120314849 |
| rs13141641  | t | c | -0.002 | 0.004 | 0.519 | 4  | 145506456 |
| rs60708069  | t | g | 0.003  | 0.005 | 0.534 | 5  | 147837664 |
| rs11168048  | t | c | -0.002 | 0.004 | 0.540 | 5  | 147842353 |
| rs2843016   | a | g | 0.003  | 0.004 | 0.550 | 1  | 120322961 |
| rs12435118  | t | c | -0.003 | 0.006 | 0.551 | 14 | 102673993 |
| rs754388    | c | g | 0.003  | 0.005 | 0.578 | 14 | 93115410  |
| rs1435867   | t | c | 0.004  | 0.008 | 0.608 | 2  | 229510929 |
| rs56168343  | t | c | 0.002  | 0.005 | 0.614 | 5  | 156928008 |
| rs1265120   | a | c | -0.002 | 0.004 | 0.618 | 8  | 103190071 |
| rs16825267  | c | g | 0.003  | 0.007 | 0.656 | 2  | 229569919 |
| rs12459249  | t | c | -0.002 | 0.004 | 0.657 | 19 | 41339896  |
| rs16891339  | a | g | 0.005  | 0.011 | 0.666 | 6  | 80647622  |
| rs9396712   | t | c | 0.002  | 0.004 | 0.685 | 6  | 16818625  |
| rs11628180  | a | g | -0.002 | 0.004 | 0.694 | 14 | 93068516  |
| rs1265122   | t | c | -0.001 | 0.004 | 0.708 | 8  | 103190530 |
| rs3782563   | a | g | -0.001 | 0.004 | 0.794 | 12 | 96639739  |
| rs78242330  | t | c | 0.002  | 0.008 | 0.800 | 14 | 93111715  |
| rs10429950  | t | c | 0.001  | 0.004 | 0.828 | 1  | 218624533 |
| rs4846479   | t | g | -0.001 | 0.004 | 0.841 | 1  | 218598410 |
| rs192394604 | t | g | 0.001  | 0.004 | 0.868 | 8  | 103148763 |
| rs2047409   | a | g | -0.001 | 0.004 | 0.887 | 4  | 106137033 |
| rs7733401   | a | c | -0.001 | 0.004 | 0.892 | 5  | 147833281 |
| rs4597955   | a | g | -0.001 | 0.004 | 0.895 | 5  | 147847273 |
| rs647097    | t | c | 0.001  | 0.004 | 0.901 | 18 | 8808464   |
| rs13147502  | a | g | 0.000  | 0.004 | 0.935 | 4  | 106143797 |
| rs7727161   | t | g | 0.000  | 0.004 | 0.945 | 5  | 147832486 |
| rs631126    | t | c | 0.000  | 0.004 | 0.966 | 18 | 8800723   |

A1: first allele; A2: second allele; Chr: chromosome; DLCO/VA: Diffusing capacity of the lung for carbon monoxide by alveolar volume; SE: Standard error; Pos: Position.

Model1: Adjusted for age, sex and principal components of genetic relatedness.

Bold indicates statistical significance.

**Table E7 Overlap with reported COPD-associated variants and those associated with DLCO/VA in Model 2**

| Marker Name | A1 | A2 | Effect | SE    | P-value  | Chr | Pos       |
|-------------|----|----|--------|-------|----------|-----|-----------|
| rs9403391   | t  | c  | 0.061  | 0.010 | 1.09E-09 | 6   | 142814991 |
| rs13192074  | a  | g  | 0.027  | 0.006 | 1.27E-06 | 6   | 142834078 |
| rs11853359  | a  | g  | -0.016 | 0.004 | 5.40E-06 | 15  | 71621524  |
| rs9399401   | t  | c  | -0.017 | 0.004 | 1.11E-05 | 6   | 142668901 |
| rs2039987   | a  | c  | -0.017 | 0.004 | 1.34E-05 | 6   | 142655490 |
| rs1441358   | t  | g  | 0.015  | 0.004 | 1.73E-05 | 15  | 71612514  |
| rs2415116   | t  | c  | -0.014 | 0.004 | 5.76E-04 | 15  | 71673185  |
| rs72811310  | t  | g  | -0.015 | 0.005 | 5.88E-03 | 5   | 156948318 |
| rs28929474  | t  | c  | -0.034 | 0.013 | 0.011    | 14  | 94844947  |
| rs112458284 | t  | c  | 0.031  | 0.013 | 0.018    | 14  | 94672731  |
| rs17486278  | a  | c  | 0.008  | 0.004 | 0.020    | 15  | 78867482  |
| rs11727735  | a  | g  | 0.015  | 0.007 | 0.024    | 4   | 106631870 |
| rs17035917  | t  | c  | -0.014 | 0.007 | 0.034    | 4   | 106520742 |
| rs11905172  | t  | c  | -0.010 | 0.005 | 0.036    | 20  | 30797628  |
| rs55724484  | a  | g  | 0.007  | 0.004 | 0.049    | 3   | 75380823  |
| rs56308303  | t  | c  | 0.007  | 0.004 | 0.060    | 15  | 71669872  |
| rs6837671   | a  | g  | 0.007  | 0.004 | 0.063    | 4   | 89873092  |
| rs7733088   | a  | g  | 0.006  | 0.004 | 0.116    | 5   | 147856333 |
| rs36110266  | a  | g  | 0.008  | 0.005 | 0.117    | 20  | 30695031  |
| rs6058526   | a  | g  | -0.008 | 0.005 | 0.120    | 20  | 30699632  |
| rs2034241   | a  | g  | 0.006  | 0.004 | 0.148    | 5   | 65085330  |
| rs1568010   | t  | g  | 0.005  | 0.004 | 0.154    | 15  | 71668512  |
| rs2955083   | a  | t  | 0.007  | 0.005 | 0.165    | 3   | 127961178 |
| rs17707300  | t  | c  | -0.005 | 0.004 | 0.165    | 16  | 28593347  |
| rs185212652 | a  | t  | 0.007  | 0.005 | 0.168    | 5   | 147837533 |
| rs11168048  | t  | c  | -0.005 | 0.004 | 0.170    | 5   | 147842353 |
| rs12189594  | t  | g  | 0.005  | 0.003 | 0.172    | 6   | 14856357  |
| rs2999090   | a  | g  | 0.007  | 0.005 | 0.175    | 3   | 127931340 |
| rs1529672   | a  | c  | 0.006  | 0.005 | 0.198    | 3   | 25520582  |
| rs1737890   | t  | g  | 0.006  | 0.005 | 0.220    | 20  | 31042595  |
| rs6087358   | a  | g  | 0.006  | 0.005 | 0.230    | 20  | 30855746  |
| rs12435118  | t  | c  | -0.006 | 0.005 | 0.230    | 14  | 102673993 |
| rs13080090  | t  | g  | 0.006  | 0.005 | 0.237    | 3   | 171974838 |
| rs60708069  | t  | g  | 0.005  | 0.005 | 0.294    | 5   | 147837664 |
| rs7937      | t  | c  | 0.004  | 0.004 | 0.301    | 19  | 41302706  |
| rs10815649  | t  | c  | 0.004  | 0.004 | 0.343    | 9   | 7620482   |
| rs9396712   | t  | c  | 0.004  | 0.004 | 0.356    | 6   | 16818625  |
| rs4742382   | a  | g  | 0.004  | 0.004 | 0.358    | 9   | 7620040   |
| rs4904964   | a  | c  | 0.004  | 0.004 | 0.363    | 14  | 93099867  |
| rs2076295   | t  | g  | -0.003 | 0.003 | 0.391    | 6   | 7563232   |
| rs6908022   | a  | t  | 0.005  | 0.006 | 0.392    | 6   | 96480212  |
| rs6573633   | a  | g  | -0.003 | 0.004 | 0.409    | 14  | 66272664  |
| rs13141641  | t  | c  | -0.003 | 0.004 | 0.429    | 4   | 145506456 |

|             |   |   |        |       |       |    |           |
|-------------|---|---|--------|-------|-------|----|-----------|
| rs647097    | t | c | 0.003  | 0.004 | 0.453 | 18 | 8808464   |
| rs2806356   | t | c | -0.003 | 0.004 | 0.461 | 6  | 109266255 |
| rs11628180  | a | g | -0.003 | 0.004 | 0.463 | 14 | 93068516  |
| rs754388    | c | g | 0.003  | 0.005 | 0.470 | 14 | 93115410  |
| rs10429950  | t | c | -0.002 | 0.004 | 0.578 | 1  | 218624533 |
| rs78242330  | t | c | 0.004  | 0.008 | 0.578 | 14 | 93111715  |
| rs13147502  | a | g | -0.002 | 0.004 | 0.583 | 4  | 106143797 |
| rs1265120   | a | c | -0.002 | 0.004 | 0.602 | 8  | 103190071 |
| rs4846479   | t | g | 0.002  | 0.004 | 0.604 | 1  | 218598410 |
| rs2047409   | a | g | -0.002 | 0.004 | 0.608 | 4  | 106137033 |
| rs7186831   | a | g | -0.002 | 0.004 | 0.634 | 16 | 75473155  |
| rs58873874  | t | c | -0.003 | 0.007 | 0.636 | 5  | 156945148 |
| rs631126    | t | c | -0.002 | 0.004 | 0.662 | 18 | 8800723   |
| rs75720504  | a | c | -0.003 | 0.007 | 0.683 | 5  | 156935973 |
| rs1265122   | t | c | -0.001 | 0.004 | 0.698 | 8  | 103190530 |
| rs11904894  | t | c | 0.002  | 0.004 | 0.710 | 20 | 19056247  |
| rs1435867   | t | c | 0.002  | 0.007 | 0.739 | 2  | 229510929 |
| rs721917    | a | g | -0.001 | 0.003 | 0.760 | 10 | 81706324  |
| rs7727161   | t | g | 0.001  | 0.004 | 0.766 | 5  | 147832486 |
| rs16891339  | a | g | 0.002  | 0.010 | 0.810 | 6  | 80647622  |
| rs4597955   | a | g | 0.001  | 0.004 | 0.814 | 5  | 147847273 |
| rs192394604 | t | g | 0.001  | 0.004 | 0.821 | 8  | 103148763 |
| rs7733401   | a | c | 0.001  | 0.004 | 0.828 | 5  | 147833281 |
| rs16825267  | c | g | 0.001  | 0.007 | 0.872 | 2  | 229569919 |
| rs113554904 | a | g | 0.000  | 0.004 | 0.914 | 3  | 188483788 |
| rs2582790   | a | c | 0.000  | 0.004 | 0.916 | 1  | 120314849 |
| rs56168343  | t | c | 0.000  | 0.005 | 0.940 | 5  | 156928008 |
| rs2843016   | a | g | 0.000  | 0.004 | 0.969 | 1  | 120322961 |
| rs3782563   | a | g | 0.000  | 0.004 | 0.974 | 12 | 96639739  |
| rs12459249  | t | c | 0.000  | 0.004 | 0.989 | 19 | 41339896  |

A1: first allele; A2: second allele; Chr: chromosome; DLCO/VA: Diffusing capacity of the lung for carbon monoxide by alveolar volume; SE: Standard error; Pos: Position.

Model2: Adjusted for age, sex, weight, height, smoking and principal components of genetic relatedness.

Bold indicates statistical significance.

**Table E8 Overlap with reported emphysema-associated variants and those associated with DLCO and DLCO/VA in the models 1 and 2**

| Trait_Model    | Marker Name       | A1       | A2       | Effect       | SE           | P-value      | Chr       | Pos             |
|----------------|-------------------|----------|----------|--------------|--------------|--------------|-----------|-----------------|
| DLCO_model1    | rs13141641        | t        | c        | 0.018        | 0.024        | 0.461        | 4         | 145506456       |
|                | rs45505795        | c        | g        | 0.028        | 0.085        | 0.742        | 14        | 94756943        |
|                | rs55676755        | c        | g        | 0.052        | 0.025        | 0.034        | 15        | 78898932        |
|                | rs142200419       | t        | c        | 0.040        | 0.130        | 0.760        | 4         | 127323308       |
|                | rs74834049        | a        | t        | 0.056        | 0.035        | 0.111        | 8         | 13029877        |
|                | rs75200691        | t        | g        | -0.048       | 0.035        | 0.171        | 8         | 13054869        |
|                | rs55706246        | a        | g        | 0.108        | 0.049        | 0.029        | 21        | 35595637        |
| DLCO_model2    | rs13141641        | t        | c        | 0.025        | 0.021        | 0.237        | 4         | 145506456       |
|                | rs45505795        | c        | g        | -0.052       | 0.076        | 0.493        | 14        | 94756943        |
|                | rs55676755        | c        | g        | 0.048        | 0.022        | 0.029        | 15        | 78898932        |
|                | rs142200419       | t        | c        | 0.036        | 0.117        | 0.756        | 4         | 127323308       |
|                | rs74834049        | a        | t        | 0.068        | 0.032        | 0.032        | 8         | 13029877        |
|                | rs75200691        | t        | g        | -0.061       | 0.032        | 0.053        | 8         | 13054869        |
|                | rs55706246        | a        | g        | 0.079        | 0.044        | 0.075        | 21        | 35595637        |
| DLCO/VA_model1 | rs13141641        | t        | c        | -0.002       | 0.004        | 0.519        | 4         | 145506456       |
|                | rs45505795        | c        | g        | -0.029       | 0.014        | 0.031        | 14        | 94756943        |
|                | <b>rs55676755</b> | <b>c</b> | <b>g</b> | <b>0.011</b> | <b>0.004</b> | <b>0.004</b> | <b>15</b> | <b>78898932</b> |
|                | rs142200419       | t        | c        | -0.003       | 0.021        | 0.895        | 4         | 127323308       |
|                | rs74834049        | a        | t        | 0.011        | 0.006        | 0.044        | 8         | 13029877        |
|                | rs75200691        | t        | g        | -0.010       | 0.006        | 0.068        | 8         | 13054869        |
|                | rs55706246        | a        | g        | 0.010        | 0.008        | 0.223        | 21        | 35595637        |
| DLCO/Va_model2 | rs13141641        | t        | c        | -0.003       | 0.004        | 0.429        | 4         | 145506456       |
|                | rs45505795        | c        | g        | -0.022       | 0.013        | 0.079        | 14        | 94756943        |
|                | rs55676755        | c        | g        | 0.008        | 0.004        | 0.026        | 15        | 78898932        |
|                | rs142200419       | t        | c        | -0.009       | 0.020        | 0.644        | 4         | 127323308       |
|                | rs74834049        | a        | t        | 0.012        | 0.005        | 0.027        | 8         | 13029877        |
|                | rs75200691        | t        | g        | -0.011       | 0.005        | 0.038        | 8         | 13054869        |
|                | rs55706246        | a        | g        | 0.011        | 0.008        | 0.155        | 21        | 35595637        |

A1: first allele; A2: second allele; Chr: chromosome; DLCO: Diffusing capacity of the lung for carbon monoxide; DLCO/VA: Diffusing capacity of the lung for carbon monoxide by alveolar volume; SE: Standard error; Pos: Position.

Model1: Adjusted for age, sex and principal components of genetic relatedness.

Model2: Adjusted for age, sex, weight, height, smoking and principal components of genetic relatedness.

Bold indicates statistical significance.



**Figure E3 Haploreg analysis of the main results of the meta-analysis**

[Haploreg, <http://archive.broadinstitute.org/mammals/haploreg/haploreg.php>]

Query SNP: rs1665630 and variants with r<sup>2</sup> >= 0.8

| chr | pos (hg38) | LD (r <sup>2</sup> ) | LD (D') | variant    | Ref | Alt | AFR freq | AMR freq | ASN freq | EUR freq | SIPIV cons | Promoter histone marks | Enhancer histone marks | DNAse        | Proteins bound   | Motifs changed   | NHGRIEBI GWAS hits | GRASP OTL hits | Selected eQTL hits | GENCODE genes | dbSNP func annot |
|-----|------------|----------------------|---------|------------|-----|-----|----------|----------|----------|----------|------------|------------------------|------------------------|--------------|------------------|------------------|--------------------|----------------|--------------------|---------------|------------------|
| 10  | 71668698   | 0.86                 | 0.93    | rs1665618  | G   | A   | 0.48     | 0.41     | 0.57     | 0.46     |            | ESDR                   | 6 tissues              | ESDR,ESG     |                  | 4 altered motifs |                    |                |                    | CDH23         | intronic         |
| 10  | 71668719   | 0.81                 | 0.93    | rs1665690  | G   | A   | 0.22     | 0.29     | 0.38     | 0.45     |            | ESDR                   | 6 tissues              | ESDR,ESG     |                  | ERalpha-4,Pax6   |                    |                |                    | CDH23         | intronic         |
| 10  | 71669721   | 0.86                 | 0.93    | rs1665691  | G   | C   | 0.47     | 0.41     | 0.57     | 0.46     |            | 6 tissues              | 6 tissues              | 6 tissues    |                  | HNF1,Pdx-1,Rad21 |                    |                |                    | CDH23         | intronic         |
| 10  | 71669823   | 0.81                 | 0.93    | rs1665692  | G   | A   | 0.22     | 0.29     | 0.38     | 0.45     |            | 6 tissues              | 6 tissues              | 6 tissues    |                  | MAFF,MAFK        |                    |                |                    | CDH23         | intronic         |
| 10  | 71660471   | 0.82                 | 0.93    | rs1665619  | T   | G   | 0.25     | 0.29     | 0.38     | 0.45     |            | 4 tissues              | BLD, BLD               | BLD, BLD     |                  | 6 altered motifs |                    |                |                    | CDH23         | intronic         |
| 10  | 71660805   | 0.8                  | 0.93    | rs17471172 | T   | G,G | 0.25     | 0.28     | 0.38     | 0.45     |            | ESG,IPSC, BLD          | IPSC                   | IPSC         |                  | 6 altered motifs |                    |                |                    | CDH23         | intronic         |
| 10  | 71661081   | 0.87                 | 0.94    | rs1665622  | G   | A   | 0.23     | 0.29     | 0.38     | 0.46     |            | ESG,IPSC, BLD          | ESG                    | ESG          |                  | Nanog            |                    |                |                    | CDH23         | intronic         |
| 10  | 71661447   | 0.93                 | 0.98    | rs1665623  | G   | A   | 0.27     | 0.39     | 0.56     | 0.48     |            | ESG,ESDR,IPSC          | ESG,ESDR,IPSC          | 4 tissues    |                  | CEBPB,CEBPD      |                    |                |                    | CDH23         | intronic         |
| 10  | 71661471   | 0.87                 | 0.94    | rs1665694  | G   | T   | 0.23     | 0.29     | 0.38     | 0.46     |            | ESG,ESDR,IPSC          | 4 tissues              | 4 tissues    |                  | Ets              |                    |                |                    | CDH23         | intronic         |
| 10  | 71663433   | 0.94                 | 1       | rs1665696  | C   | T   | 0.50     | 0.41     | 0.56     | 0.48     |            | 5 tissues              | 9 tissues              | 9 tissues    |                  | CTCF             |                    |                |                    | CDH23         | intronic         |
| 10  | 71664945   | 0.93                 | 0.97    | rs1665698  | T   | G   | 0.25     | 0.40     | 0.55     | 0.46     |            | IPSC,ESG,BRST          | IPSC,ESG,BRST          | ZNF263       |                  | LBP-1            |                    |                |                    | CDH23         | intronic         |
| 10  | 71665426   | 0.98                 | 1       | rs1665627  | G   | A   | 0.28     | 0.41     | 0.56     | 0.47     |            | 4 tissues              | 7 tissues              | ESG,IPSC,MUS | 4 bound proteins | 4 altered motifs |                    |                |                    | CDH23         | intronic         |
| 10  | 71667105   | 1                    | 1       | rs1665620  | C   | T   | 0.39     | 0.41     | 0.56     | 0.47     |            | 4 tissues              | 7 tissues              | 7 tissues    | 4 altered motifs | 4 altered motifs |                    |                |                    | CDH23         | intronic         |
| 10  | 71667300   | 0.88                 | 0.99    | rs1665631  | G   | A   | 0.47     | 0.44     | 0.62     | 0.50     |            | 4 tissues              | 13 tissues             | 13 tissues   | 4 bound proteins | 5 altered motifs |                    |                |                    | CDH23         | intronic         |

Query SNP: rs2423124 and variants with r<sup>2</sup> >= 0.8

| chr | pos (hg38) | LD (r <sup>2</sup> ) | LD (D') | variant   | Ref | Alt | AFR freq | AMR freq | ASN freq | EUR freq | SIPIV cons | Promoter histone marks | Enhancer histone marks | DNAse     | Proteins bound | Motifs changed   | NHGRIEBI GWAS hits | GRASP OTL hits | Selected eQTL hits | GENCODE genes     | dbSNP func annot |
|-----|------------|----------------------|---------|-----------|-----|-----|----------|----------|----------|----------|------------|------------------------|------------------------|-----------|----------------|------------------|--------------------|----------------|--------------------|-------------------|------------------|
| 20  | 5656299    | 1                    | 1       | rs2423124 | T   | C   | 0.75     | 0.70     | 0.67     | 0.79     |            | BLD                    | 12 tissues             | 6 tissues |                | 5 altered motifs |                    |                |                    | 45kb 5' of GPCPD1 |                  |

Query SNP: rs17280293 and variants with r<sup>2</sup> >= 0.8

| chr | pos (hg38) | LD (r <sup>2</sup> ) | LD (D') | variant    | Ref | Alt | AFR freq | AMR freq | ASN freq | EUR freq | SIPIV cons | Promoter histone marks | Enhancer histone marks | DNAse      | Proteins bound   | Motifs changed   | NHGRIEBI GWAS hits | GRASP OTL hits | Selected eQTL hits | GENCODE genes | dbSNP func annot |
|-----|------------|----------------------|---------|------------|-----|-----|----------|----------|----------|----------|------------|------------------------|------------------------|------------|------------------|------------------|--------------------|----------------|--------------------|---------------|------------------|
| 6   | 142367832  | 1                    | 1       | rs17280293 | A   | G   | 0.00     | 0.06     | 0.03     | 0.03     |            | PCT,LMG,GB             | 6 tissues              | 12 tissues | P300             | 5 altered motifs |                    |                |                    | GPR126        | missense         |
| 6   | 142401729  | 0.86                 | 1       | rs17380219 | G   | A   | 0.09     | 0.07     | 0.10     | 0.04     |            | ESDR,GI,VAS            | LV                     |            | 6 altered motifs | Asc12,PU.1       |                    |                |                    | GPR126        | intronic         |
| 6   | 14240405   | 0.89                 | 1       | rs17380221 | G   | C   | 0.09     | 0.07     | 0.10     | 0.04     |            |                        |                        |            |                  |                  |                    |                |                    | GPR126        | intronic         |

Query SNP: rs918606 and variants with r<sup>2</sup> >= 0.8

| chr | pos (hg38) | LD (r <sup>2</sup> ) | LD (D') | variant    | Ref | Alt | AFR freq | AMR freq | ASN freq | EUR freq | SIPIV cons | Promoter histone marks | Enhancer histone marks | DNAse | Proteins bound    | Motifs changed  | NHGRIEBI GWAS hits | GRASP OTL hits | Selected eQTL hits | GENCODE genes     | dbSNP func annot |
|-----|------------|----------------------|---------|------------|-----|-----|----------|----------|----------|----------|------------|------------------------|------------------------|-------|-------------------|-----------------|--------------------|----------------|--------------------|-------------------|------------------|
| 5   | 62599002   | 0.87                 | 0.97    | rs171128   | G   | A   | 0.67     | 0.59     | 0.37     | 0.57     |            |                        |                        |       | FXR               | 7 hits          |                    |                |                    | IP011             | intronic         |
| 5   | 62603321   | 0.87                 | 0.97    | rs10054305 | A   | G   | 0.67     | 0.59     | 0.37     | 0.57     |            |                        |                        |       | GRI1b             | 7 hits          |                    |                |                    | IP011             | intronic         |
| 5   | 62604322   | 0.86                 | 0.97    | rs10071588 | C   | A   | 0.67     | 0.59     | 0.36     | 0.57     |            |                        |                        |       | Me12              | 5 hits          |                    |                |                    | IP011             | intronic         |
| 5   | 62611651   | 0.87                 | 0.97    | rs1729526  | G   | T   | 0.70     | 0.59     | 0.37     | 0.57     |            |                        |                        |       | 19 altered motifs |                 |                    |                |                    | IP011             | intronic         |
| 5   | 62620506   | 0.86                 | 0.95    | rs6449601  | G   | A   | 0.65     | 0.59     | 0.36     | 0.56     |            |                        |                        |       | Pax-5             | 6 hits          |                    |                |                    | IP011             | intronic         |
| 5   | 62624214   | 0.9                  | 0.99    | rs6888641  | A   | G   | 0.68     | 0.59     | 0.37     | 0.57     |            | ESDR                   |                        |       | Me12              | 6 hits          |                    |                |                    | IP011             | intronic         |
| 5   | 62630552   | 1                    | 1       | rs918606   | G   | A   | 0.58     | 0.57     | 0.36     | 0.55     |            | CHOP,CEBP alpha,Zbtb3  |                        |       | CHOP              | 2kb 3' of IP011 |                    |                |                    | IP011             | intronic         |
| 5   | 62630910   | 0.91                 | 1       | rs10072795 | T   | C   | 0.58     | 0.58     | 0.37     | 0.57     |            |                        |                        |       | Ik-2,Ik-3,Pou2f2  | 10 hits         |                    |                |                    | 2,3kb 3' of IP011 |                  |
| 5   | 62635736   | 0.9                  | 1       | rs1541672  | C   | A   | 0.64     | 0.58     | 0.37     | 0.57     |            |                        |                        |       | 4 altered motifs  |                 |                    |                |                    | 7,2kb 3' of IP011 |                  |
| 5   | 62637242   | 0.89                 | 0.99    | rs6449602  | A   | G   | 0.38     | 0.56     | 0.37     | 0.57     |            | STEM                   |                        |       | Hoxb3             | 7 hits          |                    |                |                    | 8,7kb 3' of IP011 |                  |

Query SNP: rs75834976 and variants with r<sup>2</sup> >= 0.8

| chr | pos (hg38) | LD (r <sup>2</sup> ) | LD (D') | variant    | Ref | Alt | AFR freq | AMR freq | ASN freq | EUR freq | SIPIV cons | Promoter histone marks | Enhancer histone marks | DNAse | Proteins bound   | Motifs changed  | NHGRIEBI GWAS hits | GRASP OTL hits | Selected eQTL hits | GENCODE genes | dbSNP func annot |
|-----|------------|----------------------|---------|------------|-----|-----|----------|----------|----------|----------|------------|------------------------|------------------------|-------|------------------|-----------------|--------------------|----------------|--------------------|---------------|------------------|
| 4   | 5219085    | 0.91                 | 1       | rs16836905 | C   | G   | 0.18     | 0.10     | 0.07     | 0.05     |            |                        | ESG,IPSC               |       | 5 altered motifs |                 |                    |                |                    | STK32B        | intronic         |
| 4   | 5227791    | 1                    | 1       | rs17224873 | G   | A   | 0.05     | 0.09     | 0.08     | 0.04     |            |                        |                        |       | 9 altered motifs |                 |                    |                |                    | STK32B        | intronic         |
| 4   | 5229559    | 1                    | 1       | rs16308788 | C   | T   | 0.02     | 0.09     | 0.08     | 0.04     |            |                        |                        |       |                  |                 |                    |                |                    | STK32B        | intronic         |
| 4   | 5229983    | 1                    | 1       | rs75834976 | C   | A   | 0.10     | 0.10     | 0.08     | 0.04     |            |                        |                        |       |                  | Cart1,Ew-1,TATA |                    |                |                    | STK32B        | intronic         |

Query SNP: rs56315120 and variants with r<sup>2</sup> >= 0.8

| chr | pos (hg38) | LD (r <sup>2</sup> ) | LD (D') | variant    | Ref | Alt | AFR freq | AMR freq | ASN freq | EUR freq | SIPIV cons | Promoter histone marks | Enhancer histone marks | DNAse | Proteins bound | Motifs changed   | NHGRIEBI GWAS hits | GRASP OTL hits | Selected eQTL hits | GENCODE genes     | dbSNP func annot |
|-----|------------|----------------------|---------|------------|-----|-----|----------|----------|----------|----------|------------|------------------------|------------------------|-------|----------------|------------------|--------------------|----------------|--------------------|-------------------|------------------|
| 1   | 165199632  | 1                    | 1       | rs56315120 | G   | A   | 0.00     | 0.04     | 0.00     | 0.05     |            |                        |                        |       |                | 8 altered motifs |                    |                |                    | 2,2kb 3' of LMK1A |                  |

**Figure E4 GTEx output of *ADGRG6* expression in different tissues**

GTEx portal, <http://www.gtexportal.org/home/>

Date of data extraction:18-September-2017

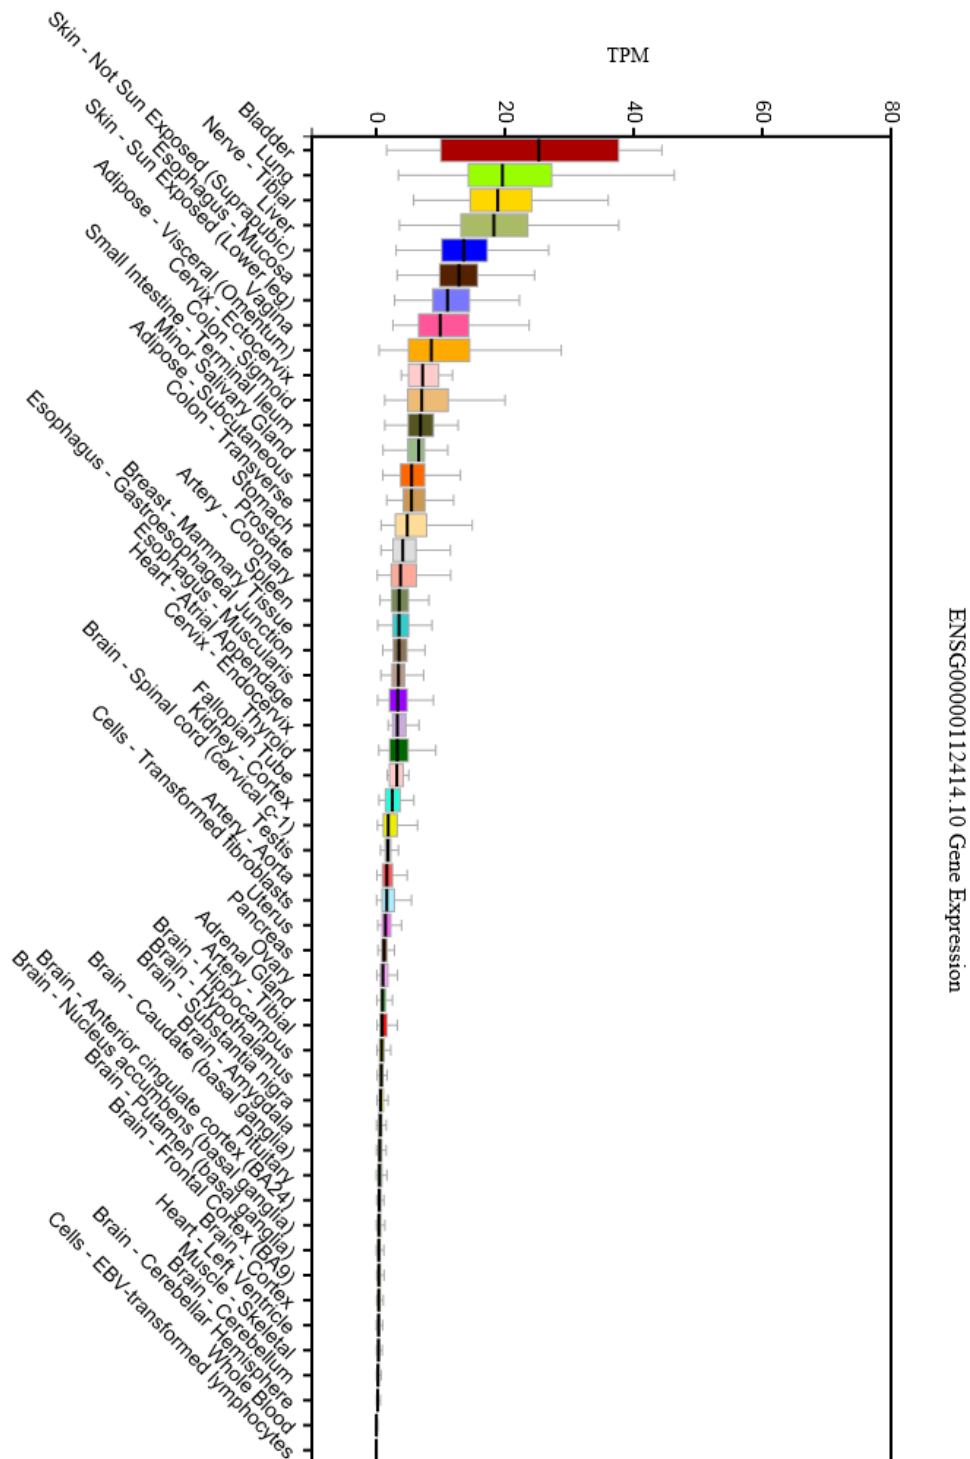

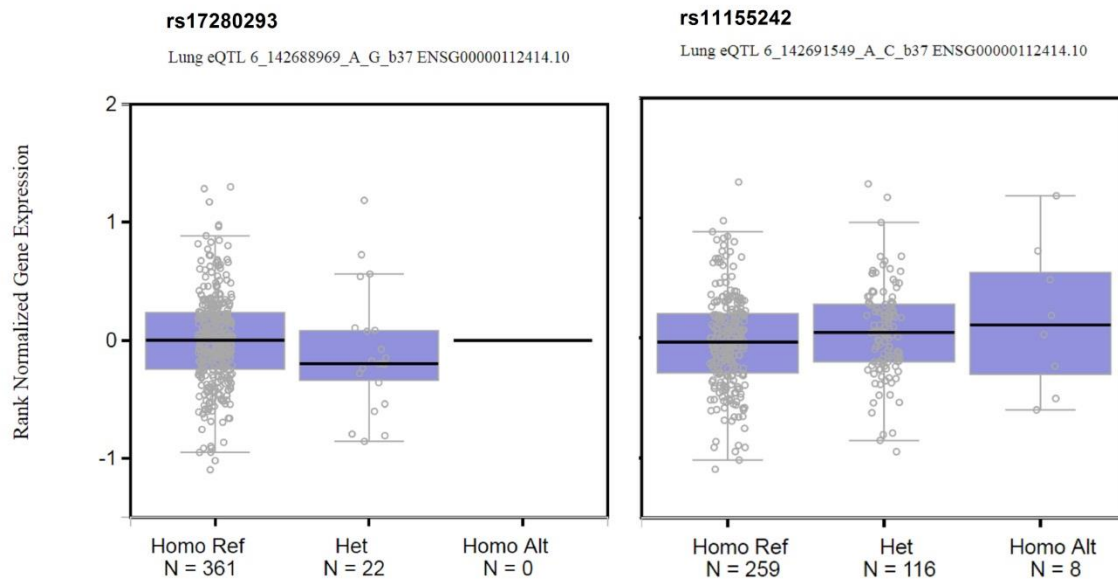

**Figure E5 The genotypes of rs17280293 and rs11155242 in GTEx lung tissue database.**

This figure is extracted from the GTEx portal. The legend on the top of the figure includes information on: tissue, analysis, chromosome\_position\_reference allele\_effect allele\_build and gene ID (*GPR126*). Important note, the effect alleles in this analysis are the reference alleles in the GWAS; therefore, for any comparison with the GWAS results, the effect estimates of the eQTL analysis must be flipped.

## Supplemental references

1. Macintyre N, Crapo RO, Viegi G, Johnson DC, van der Grinten CP, Brusasco V, et al. Standardisation of the single-breath determination of carbon monoxide uptake in the lung. *Eur Respir J*. 2005;26(4):720-35.
2. Yang J, Lee SH, Wray NR, Goddard ME, Visscher PM. GCTA-GREML accounts for linkage disequilibrium when estimating genetic variance from genome-wide SNPs. *Proc Natl Acad Sci U S A*. 2016;113(32):E4579-80.
3. Almasy L, Blangero J. Multipoint quantitative-trait linkage analysis in general pedigrees. *American Journal of Human Genetics*. 1998;62(5):1198-211.
4. Bulik-Sullivan BK, Loh PR, Finucane HK, Ripke S, Yang J, Schizophrenia Working Group of the Psychiatric Genomics C, et al. LD Score regression distinguishes confounding from polygenicity in genome-wide association studies. *Nat Genet*. 2015;47(3):291-5.
5. Wain LV, Shrine N, Artigas MS, Erzurumluoglu AM, Noyvert B, Bossini-Castillo L, et al. Genome-wide association analyses for lung function and chronic obstructive pulmonary disease identify new loci and potential druggable targets. *Nat Genet*. 2017;49(3):416-25.
6. Wood AR, Esko T, Yang J, Vedantam S, Pers TH, Gustafsson S, et al. Defining the role of common variation in the genomic and biological architecture of adult human height. *Nat Genet*. 2014;46(11):1173-86.
7. Hobbs BD, de Jong K, Lamontagne M, Bosse Y, Shrine N, Artigas MS, et al. Genetic loci associated with chronic obstructive pulmonary disease overlap with loci for lung function and pulmonary fibrosis. *Nat Genet*. 2017;49(3):426-32.
8. Cho MH, Castaldi PJ, Hersh CP, Hobbs BD, Barr RG, Tal-Singer R, et al. A Genome-Wide Association Study of Emphysema and Airway Quantitative Imaging Phenotypes. *Am J Respir Crit Care Med*. 2015;192(5):559-69.
9. Benner C, Spencer CC, Havulinna AS, Salomaa V, Ripatti S, Pirinen M. FINEMAP: efficient variable selection using summary data from genome-wide association studies. *Bioinformatics*. 2016;32(10):1493-501.
10. Pasaniuc B, Price AL. Dissecting the genetics of complex traits using summary association statistics. *Nat Rev Genet*. 2017;18(2):117-27.
11. Vandesompele J, De Preter K, Pattyn F, Poppe B, Van Roy N, De Paepe A, et al. Accurate normalization of real-time quantitative RT-PCR data by geometric averaging of multiple internal control genes. *Genome Biol*. 2002;3(7):RESEARCH0034.
12. Crapo RO, Jensen RL, Wanger JS. Single-breath carbon monoxide diffusing capacity. *Clin Chest Med*. 2001;22(4):637-49.
13. Loth DW, Soler Artigas M, Gharib SA, Wain LV, Franceschini N, Koch B, et al. Genome-wide association analysis identifies six new loci associated with forced vital capacity. *Nat Genet*. 2014;46(7):669-77.
